# Supplementary material for: Alternative polyadenylation mediates genetic regulation of gene expression
Source: eLife journal article supplement (doi:10.7554/elife.57492), 2020-06-25
Supplement: supp [file elife-57492-supp-v1.zip]

Archive with 30 entries (30 files):
- elife_poa_e57492_Transparent_Reporting_File.docx
- elife_poa_e57492_Figure_1_figure_supplement_1.pdf
- elife_poa_e57492_Figure_1_figure_supplement_2.pdf
- elife_poa_e57492_Figure_1_figure_supplement_3.pdf
- elife_poa_e57492_Figure_1_figure_supplement_4.pdf
- elife_poa_e57492_Figure_1_figure_supplement_5.pdf
- elife_poa_e57492_Figure_1_figure_supplement_6.pdf
- elife_poa_e57492_Figure_1_figure_supplement_7.pdf
- elife_poa_e57492_Figure_1_figure_supplement_8.pdf
- elife_poa_e57492_Figure_1_figure_supplement_9.pdf
- elife_poa_e57492_Figure_1_figure_supplement_10.pdf
- elife_poa_e57492_Figure_1_figure_supplement_11.pdf
- elife_poa_e57492_Figure_2_figure_supplement_1.pdf
- elife_poa_e57492_Figure_2_figure_supplement_2.pdf
- elife_poa_e57492_Figure_2_figure_supplement_3.pdf
- elife_poa_e57492_Figure_2_figure_supplement_4.pdf
- elife_poa_e57492_Figure_2_figure_supplement_5.pdf
- elife_poa_e57492_Figure_2_figure_supplement_6.pdf
- elife_poa_e57492_Figure_2_figure_supplement_7.pdf
- elife_poa_e57492_Figure_2_figure_supplement_8.pdf
- elife_poa_e57492_Figure_3_figure_supplement_1.pdf
- elife_poa_e57492_Figure_3_figure_supplement_2.pdf
- elife_poa_e57492_Figure_3_figure_supplement_3.pdf
- elife_poa_e57492_Figure_3_figure_supplement_4.pdf
- elife_poa_e57492_Figure_4_figure_supplement_1.pdf
- elife_poa_e57492_Figure_4_figure_supplement_2.pdf
- elife_poa_e57492_Figure_4_figure_supplement_3.pdf
- elife_poa_e57492_Supplementary_file_1.pdf
- elife_poa_e57492_Supplementary_file_2.txt
- elife_poa_e57492_Supplementary_file_3.txt
