# Supplementary material for: Alternative polyadenylation mediates genetic regulation of gene expression
Source: eLife journal article supplement (doi:10.7554/elife.57492), 2020-06-25

**A**

Location of annotated signal sites  
in UTR

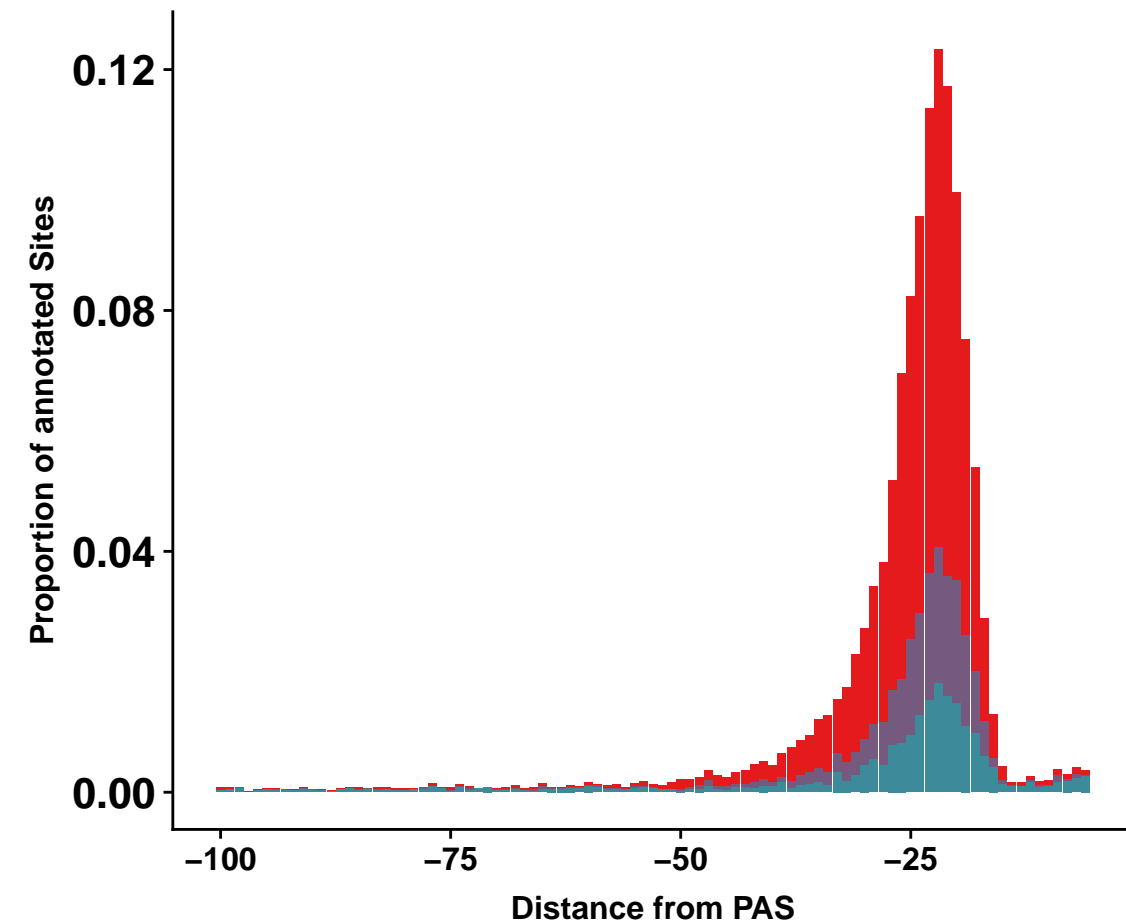**B**

Location of annotated signal sites  
for Intronic PAS

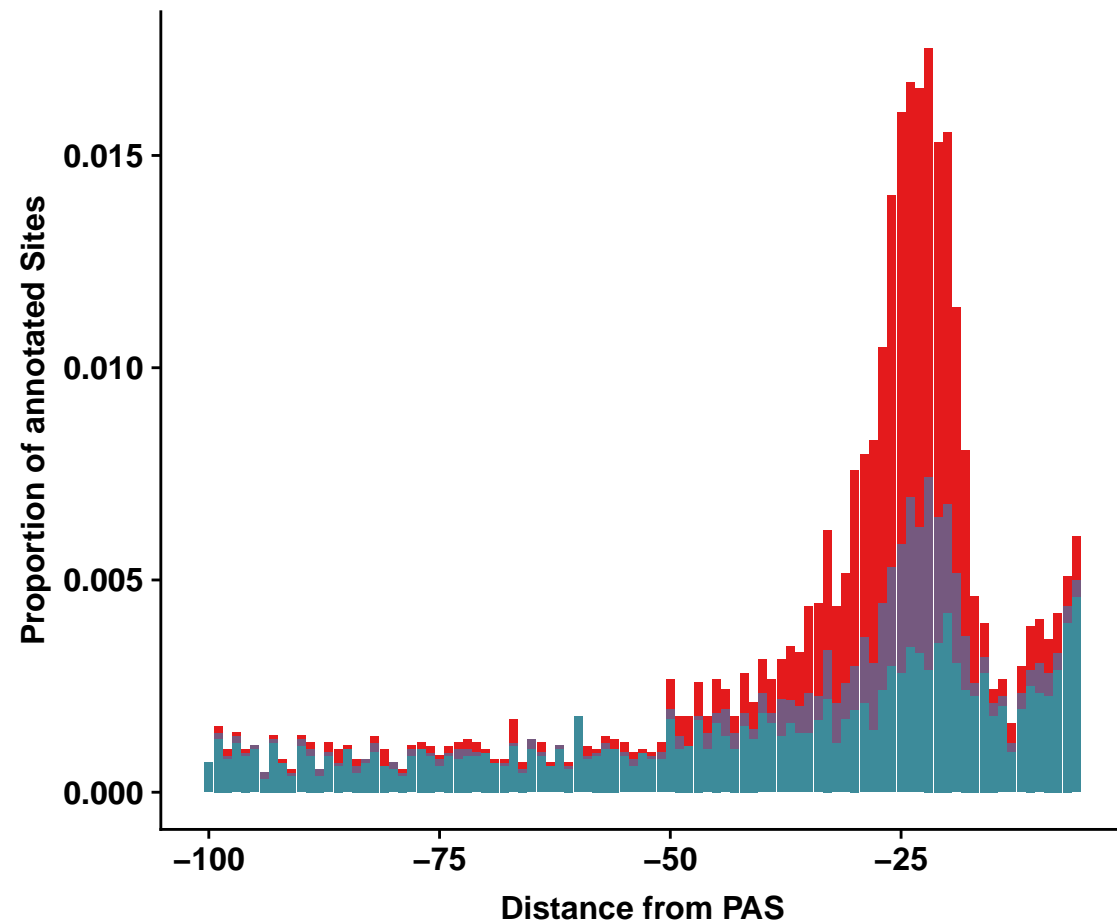

Supplement: supp [file elife-57492-supp-v1.zip › elife_poa_e57492_Figure_1_figure_supplement_2.pdf]
