# Supplementary material for: Alternative polyadenylation mediates genetic regulation of gene expression
Source: eLife journal article supplement (doi:10.7554/elife.57492), 2020-06-25
Supplement: supp [file elife-57492-supp-v1.zip › elife_poa_e57492_Figure_3_figure_supplement_3.pdf]

# ChromHMM locations for all QTLs

Proportion of QTLs

Category

- Explained\_eQTL
- Nuclear\_APA
- Total\_APA
- Unexplained\_eQTL

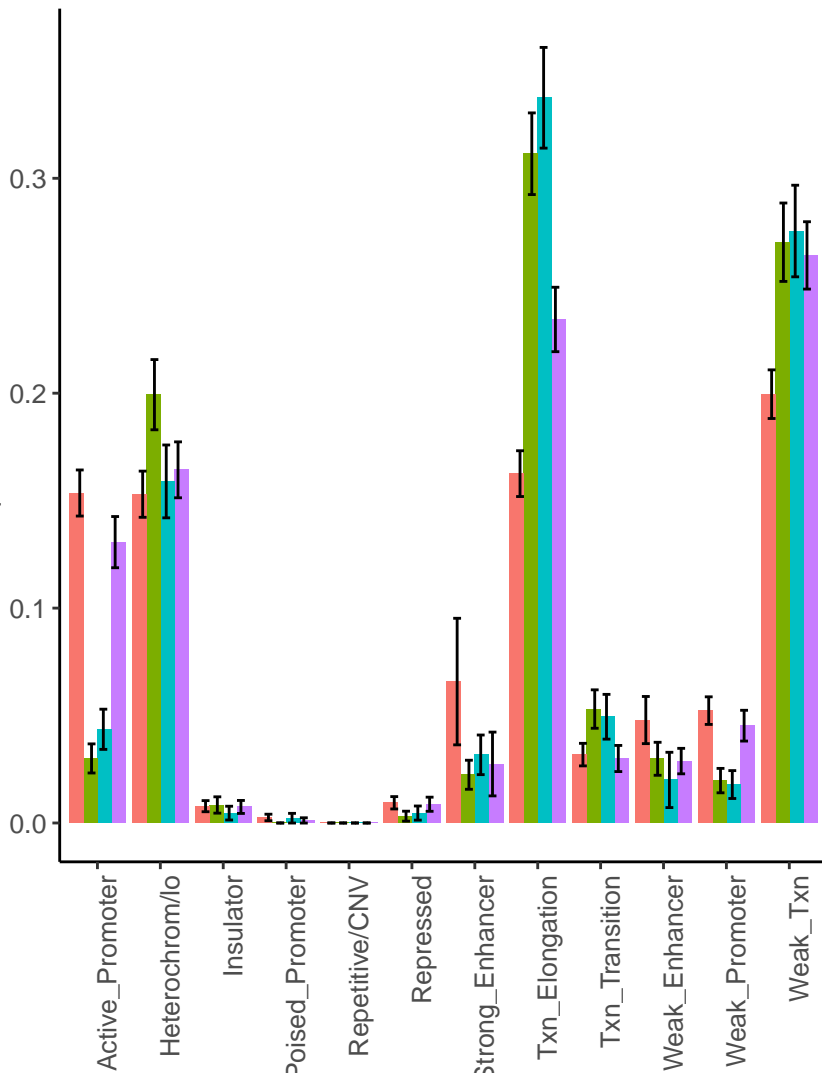

ChromHMM Category
