# Supplementary material for: Alternative polyadenylation mediates genetic regulation of gene expression
Source: eLife journal article supplement (doi:10.7554/elife.57492), 2020-06-25

**A****LD score regression results for 1000 BP around each PAS**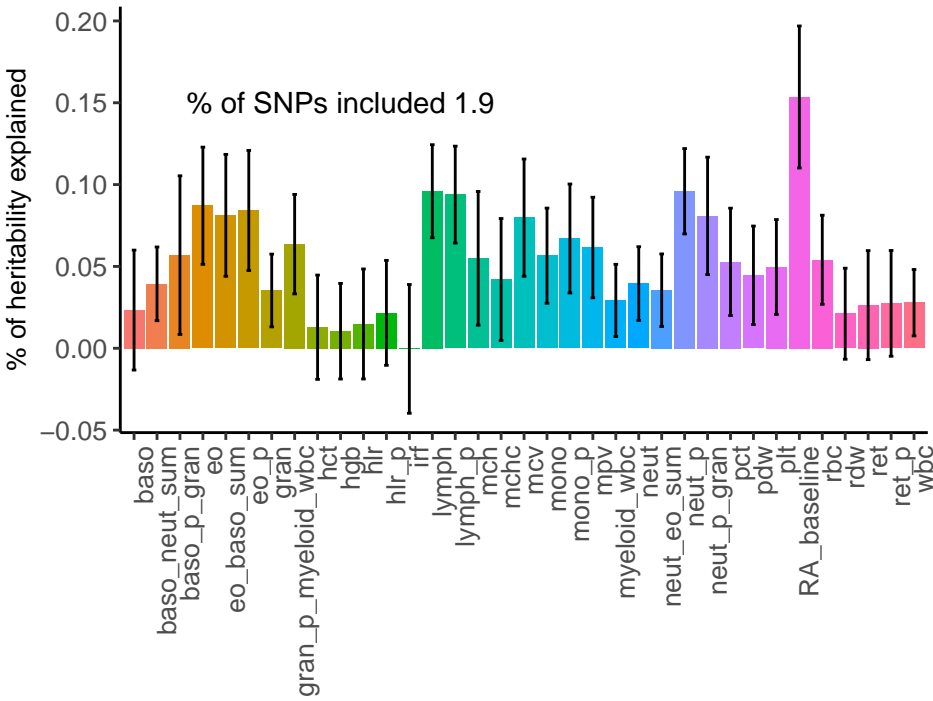**B****LD score regression results for 1000 BP around each PAS**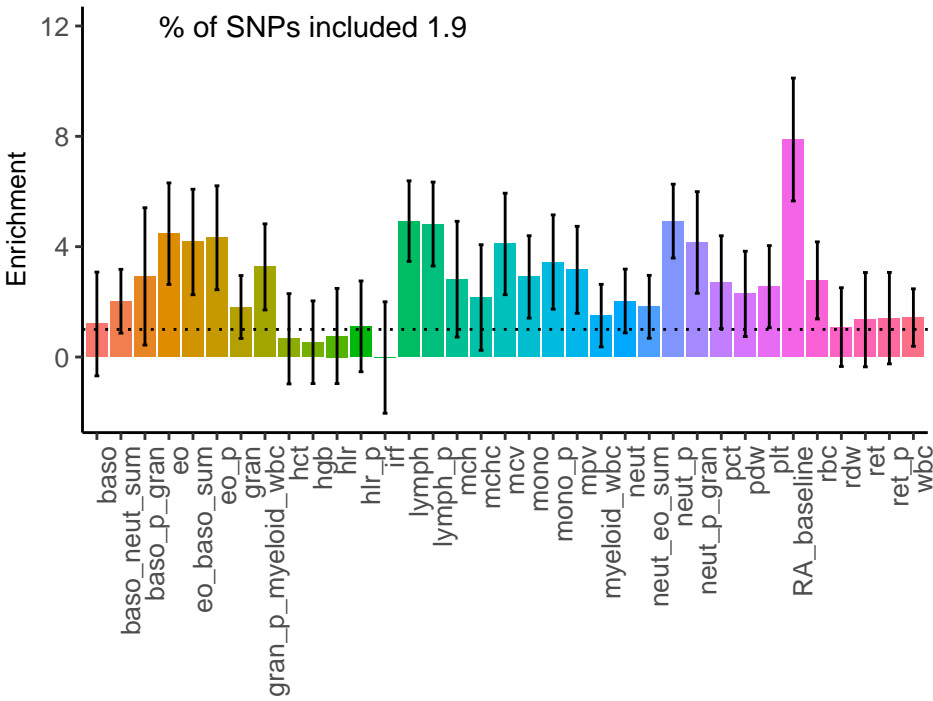

Supplement: supp [file elife-57492-supp-v1.zip › elife_poa_e57492_Figure_4_figure_supplement_3.pdf]
