# Supplementary material for: Alternative polyadenylation mediates genetic regulation of gene expression
Source: eLife journal article supplement (doi:10.7554/elife.57492), 2020-06-25
Supplement: supp [file elife-57492-supp-v1.zip › elife_poa_e57492_Supplementary_file_2.txt]

Gene PAS_Loc PAS_ID SNP apa_pvalue apa_EffectSize expression_pvalue expresion_EffectSize protein_pvalue protein_EffectSize ribo_pvalue ribo_EffectSize
DIP2B utr3 peak29441 rs11169530 0.000118357 1.6922 0.562597 0.148174 0.0375077 0.577281 0.406124 0.176339
C12orf73 utr3 peak32115 rs11111852 8.89686e-05 -1.1087 0.290962 0.140525 0.0271335 -0.326038 0.107945 -0.280494
OAS1 utr3 peak32770 rs10774671 2.71576e-10 1.31836 0.335534 -0.179712 0.0114975 -0.346212 0.00974889 -0.331465
OAS1 utr3 peak32773 rs10774671 6.49711e-06 -0.92953 0.335534 -0.179712 0.0114975 -0.346212 0.00974889 -0.331465
KPNB1 intron peak57020 rs8071832 6.14839e-09 1.42162 0.396018 -0.144238 0.0276502 -0.395942 0.0662853 0.14953
CCDC47 utr3 peak58097 rs113089680 9.88372e-07 -2.25667 0.622326 0.179624 0.0284767 -0.741908 0.209774 0.296303
DOCK7 intron peak4419 rs10889342 3.26129e-05 1.04975 0.3766 -0.0982963 0.00103583 -0.388189 0.42349 -0.086477
IFI44L utr3 peak4983 rs72933702 3.49611e-05 -1.23837 0.431558 0.260551 0.00277868 0.818405 0.0182275 0.751247
STXBP3 intron peak6151 rs6604124 0.000138003 -1.53877 0.948818 -0.0160014 0.0351995 -0.31666 0.942093 -0.0105212
RBBP5 end peak11391 rs2197909 2.93252e-05 0.92393 0.947273 0.00790192 0.0151308 -0.380608 0.818195 -0.0204596
PSMF1 utr3 peak79280 rs1217 0.000461518 2.00115 0.840891 0.059297 0.0249467 -0.531405 0.152763 -0.247114
MGME1 utr3 peak79876 rs73901137 1.29513e-05 -1.75383 0.43634 -0.214292 0.00812206 -0.652345 0.292921 -0.205931
FAM207A utr3 peak83657 rs1985483 0.00151274 -0.799235 0.204973 -0.313107 0.00866305 -0.49491 0.493858 -0.115274
FAM207A end peak83658 rs1985483 0.00134718 0.734096 0.204973 -0.313107 0.00866305 -0.49491 0.493858 -0.115274
APOL2 utr3 peak85064 rs7291184 0.000284213 0.875972 0.49115 -0.0877555 5.61694e-09 -0.872609 0.0833273 -0.334754
APOL2 utr3 peak85065 rs132759 4.74769e-05 -0.758514 0.423966 -0.104095 7.56307e-08 -0.825074 0.0661021 -0.353918
MPHOSPH10 cds peak71209 rs72903577 2.81418e-09 1.15358 0.230783 -0.188503 0.0185688 0.423751 0.495768 0.095875
SACM1L utr3 peak88511 rs145923811 2.23345e-08 -0.852296 0.752508 0.0437703 5.51729e-05 0.721947 8.1098e-07 0.731455
EIF2A utr3 peak93068 rs9820529 9.55569e-09 -1.1922 0.226988 0.129501 6.63713e-06 0.443817 0.00445356 0.325719
EIF2A utr3 peak93069 rs9820529 3.28182e-11 1.15636 0.226988 0.129501 6.63713e-06 0.443817 0.00445356 0.325719
EIF2A utr3 peak93071 rs9820529 9.15813e-05 -0.951787 0.226988 0.129501 6.63713e-06 0.443817 0.00445356 0.325719
PCYT1A end peak94996 rs1476332 5.34545e-05 0.719192 0.100649 -0.306241 0.040189 -0.413925 0.189583 -0.17136
HTT utr3 peak95775 rs362304 0.000145339 0.607002 0.909986 -0.0123162 0.00686209 -0.234823 0.377708 -0.0768902
STAP1 utr3 peak97824 rs354885 0.00028241 -0.476586 0.193641 -0.190221 0.0415434 -0.31047 0.822068 -0.0393292
STAP1 utr3 peak97825 rs354885 0.000757279 0.521675 0.193641 -0.190221 0.0415434 -0.31047 0.822068 -0.0393292
NUP155 intron peak102907 rs185955753 1.4797e-07 1.40549 0.209482 0.193905 0.0273588 0.317654 0.42013 -0.105945
ERAP1 utr3 peak105869 rs62364748 8.1635e-13 -2.29599 0.0615849 -0.498931 0.0213488 -0.610165 0.0158962 -0.463412
SQSTM1 utr3 peak110046 rs74523483 0.00133093 -1.51684 0.173537 -0.232282 0.0438725 -0.500478 0.268988 -0.271861
BTBD9 intron peak113151 rs1321056 0.000294193 1.55861 0.591619 -0.0975264 0.00120583 -0.396262 0.981933 -0.00511165
STX17 utr3 peak135747 rs10217337 7.98391e-07 0.862076 0.110115 -0.256835 0.0240948 -0.353277 0.464598 -0.114467
