# Supplementary figures and images for: Alternative polyadenylation mediates genetic regulation of gene expression
Source: eLife journal article supplement (doi:10.7554/elife.57492), 2020-06-25

Relationship between expression and Number of PAS  
Genes with >1 TPM

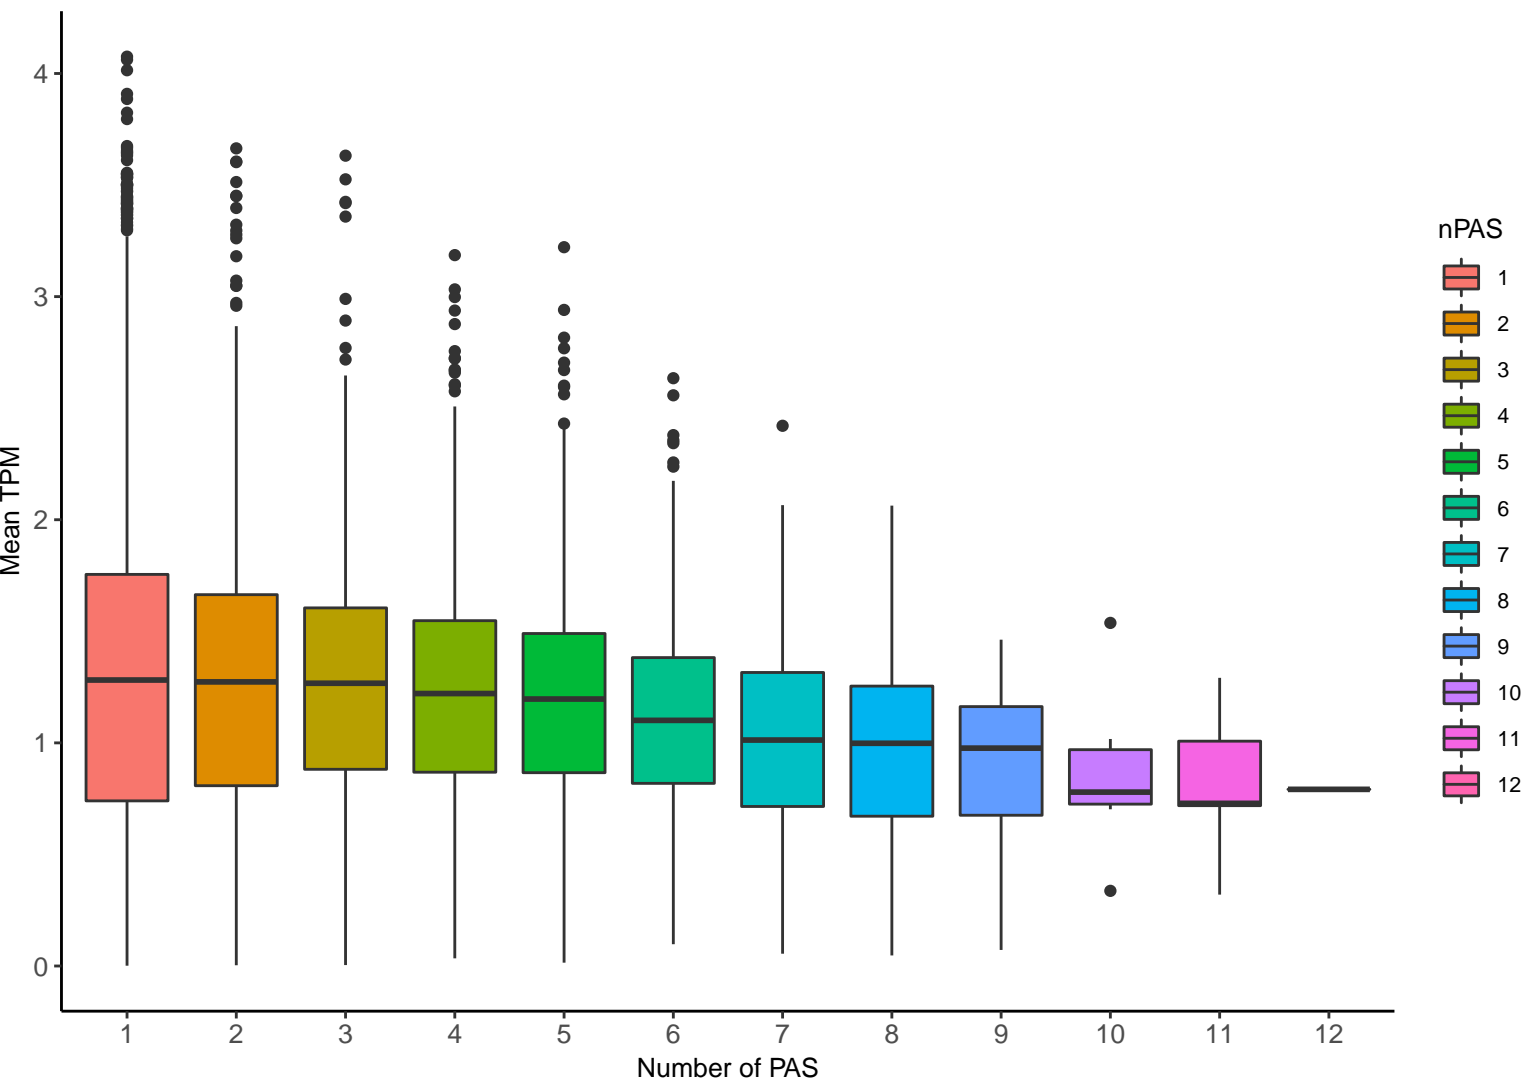

Supplement: supp [file elife-57492-supp-v1.zip › elife_poa_e57492_Figure_1_figure_supplement_1.pdf]

Intronic PAS are used at low frequencies in total fraction

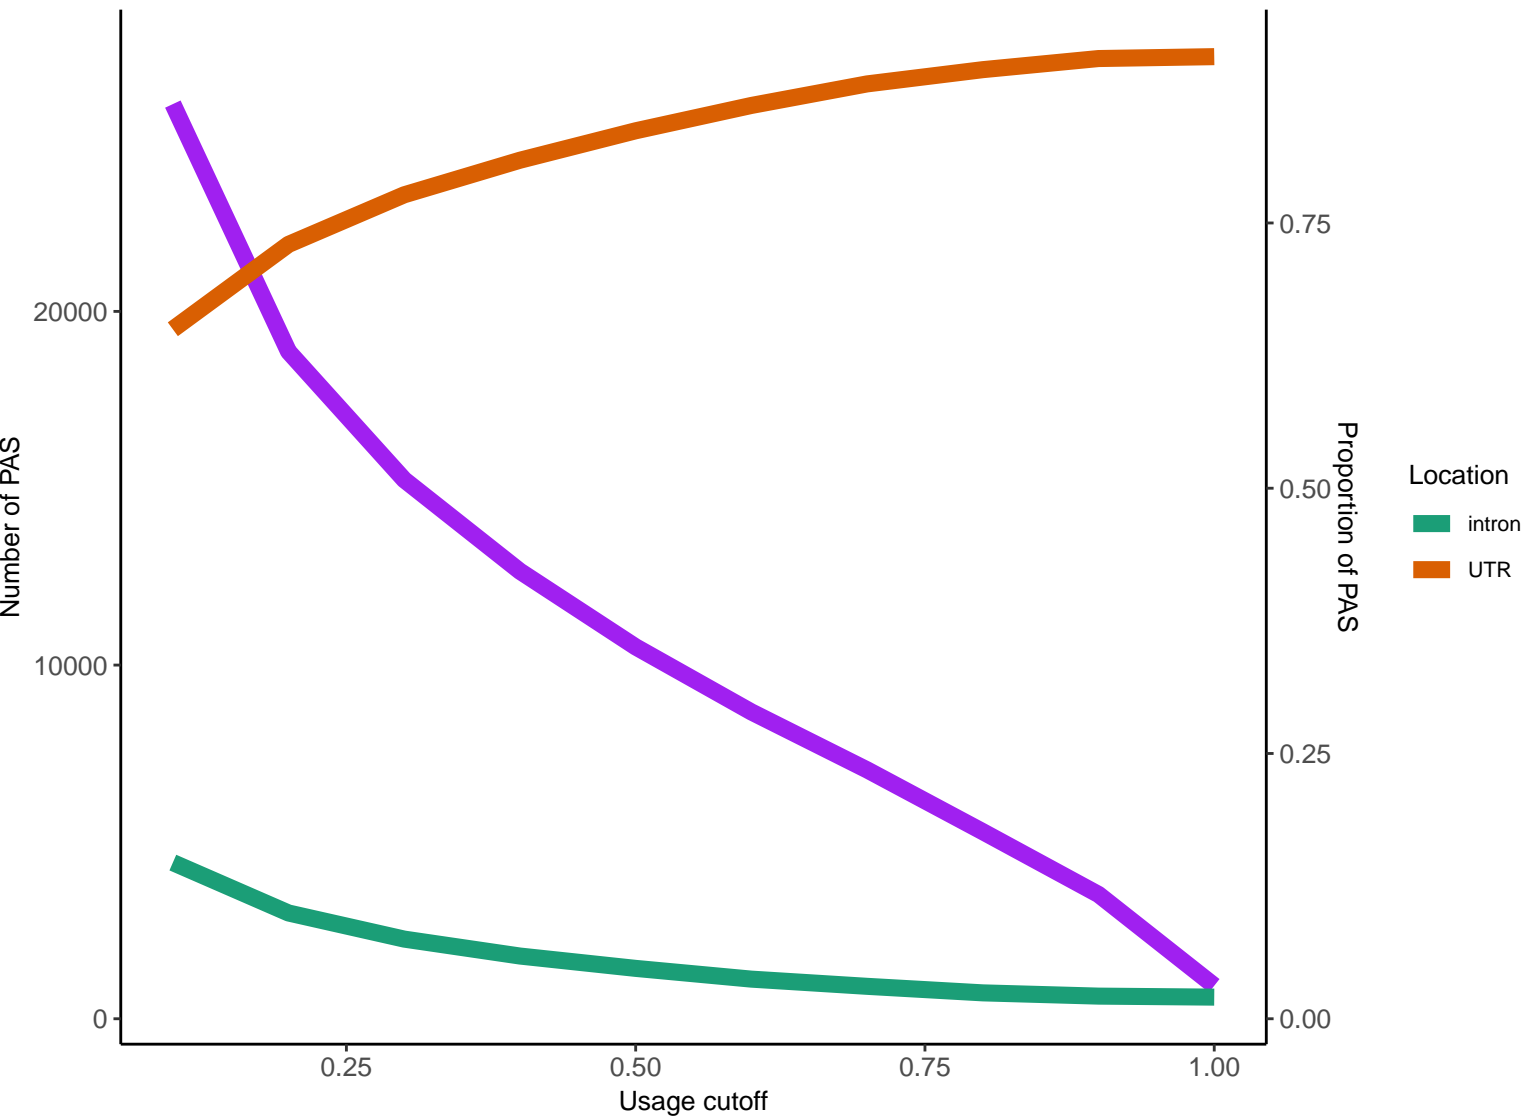

Supplement: supp [file elife-57492-supp-v1.zip › elife_poa_e57492_Figure_1_figure_supplement_3.pdf]

Number of intronic PAS by 5' Splice site strength

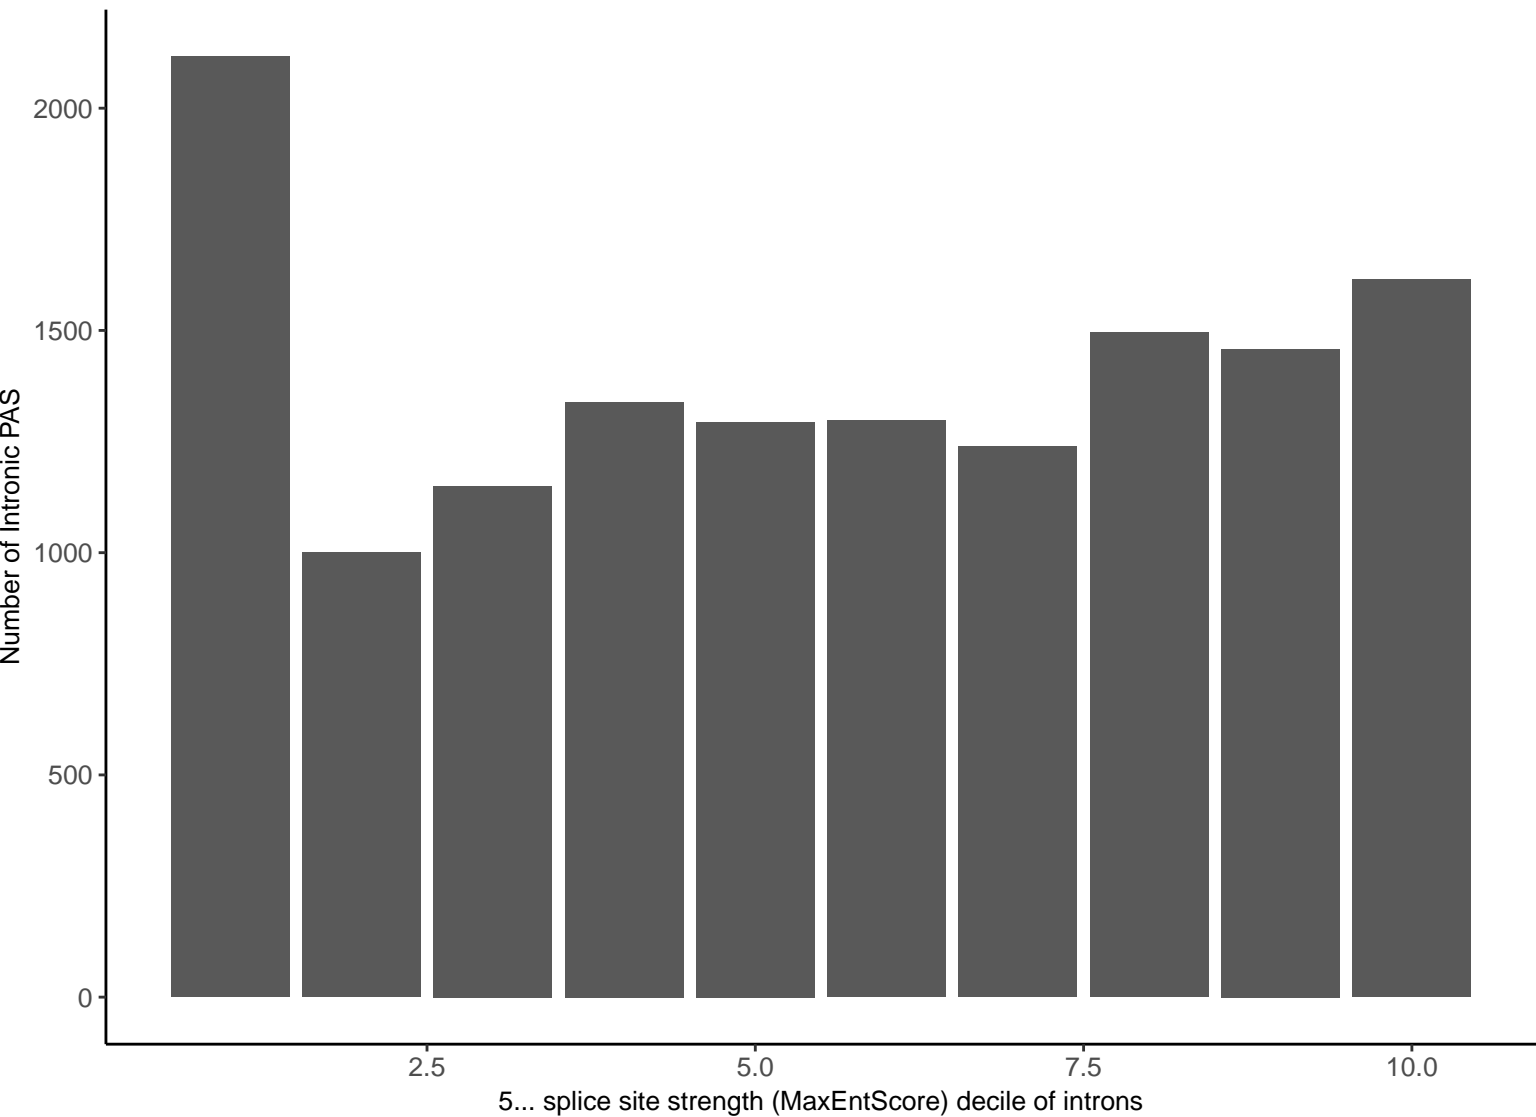

Supplement: supp [file elife-57492-supp-v1.zip › elife_poa_e57492_Figure_1_figure_supplement_4.pdf]

Proportion of Intronic and 3' UTR PAS Differentially Used

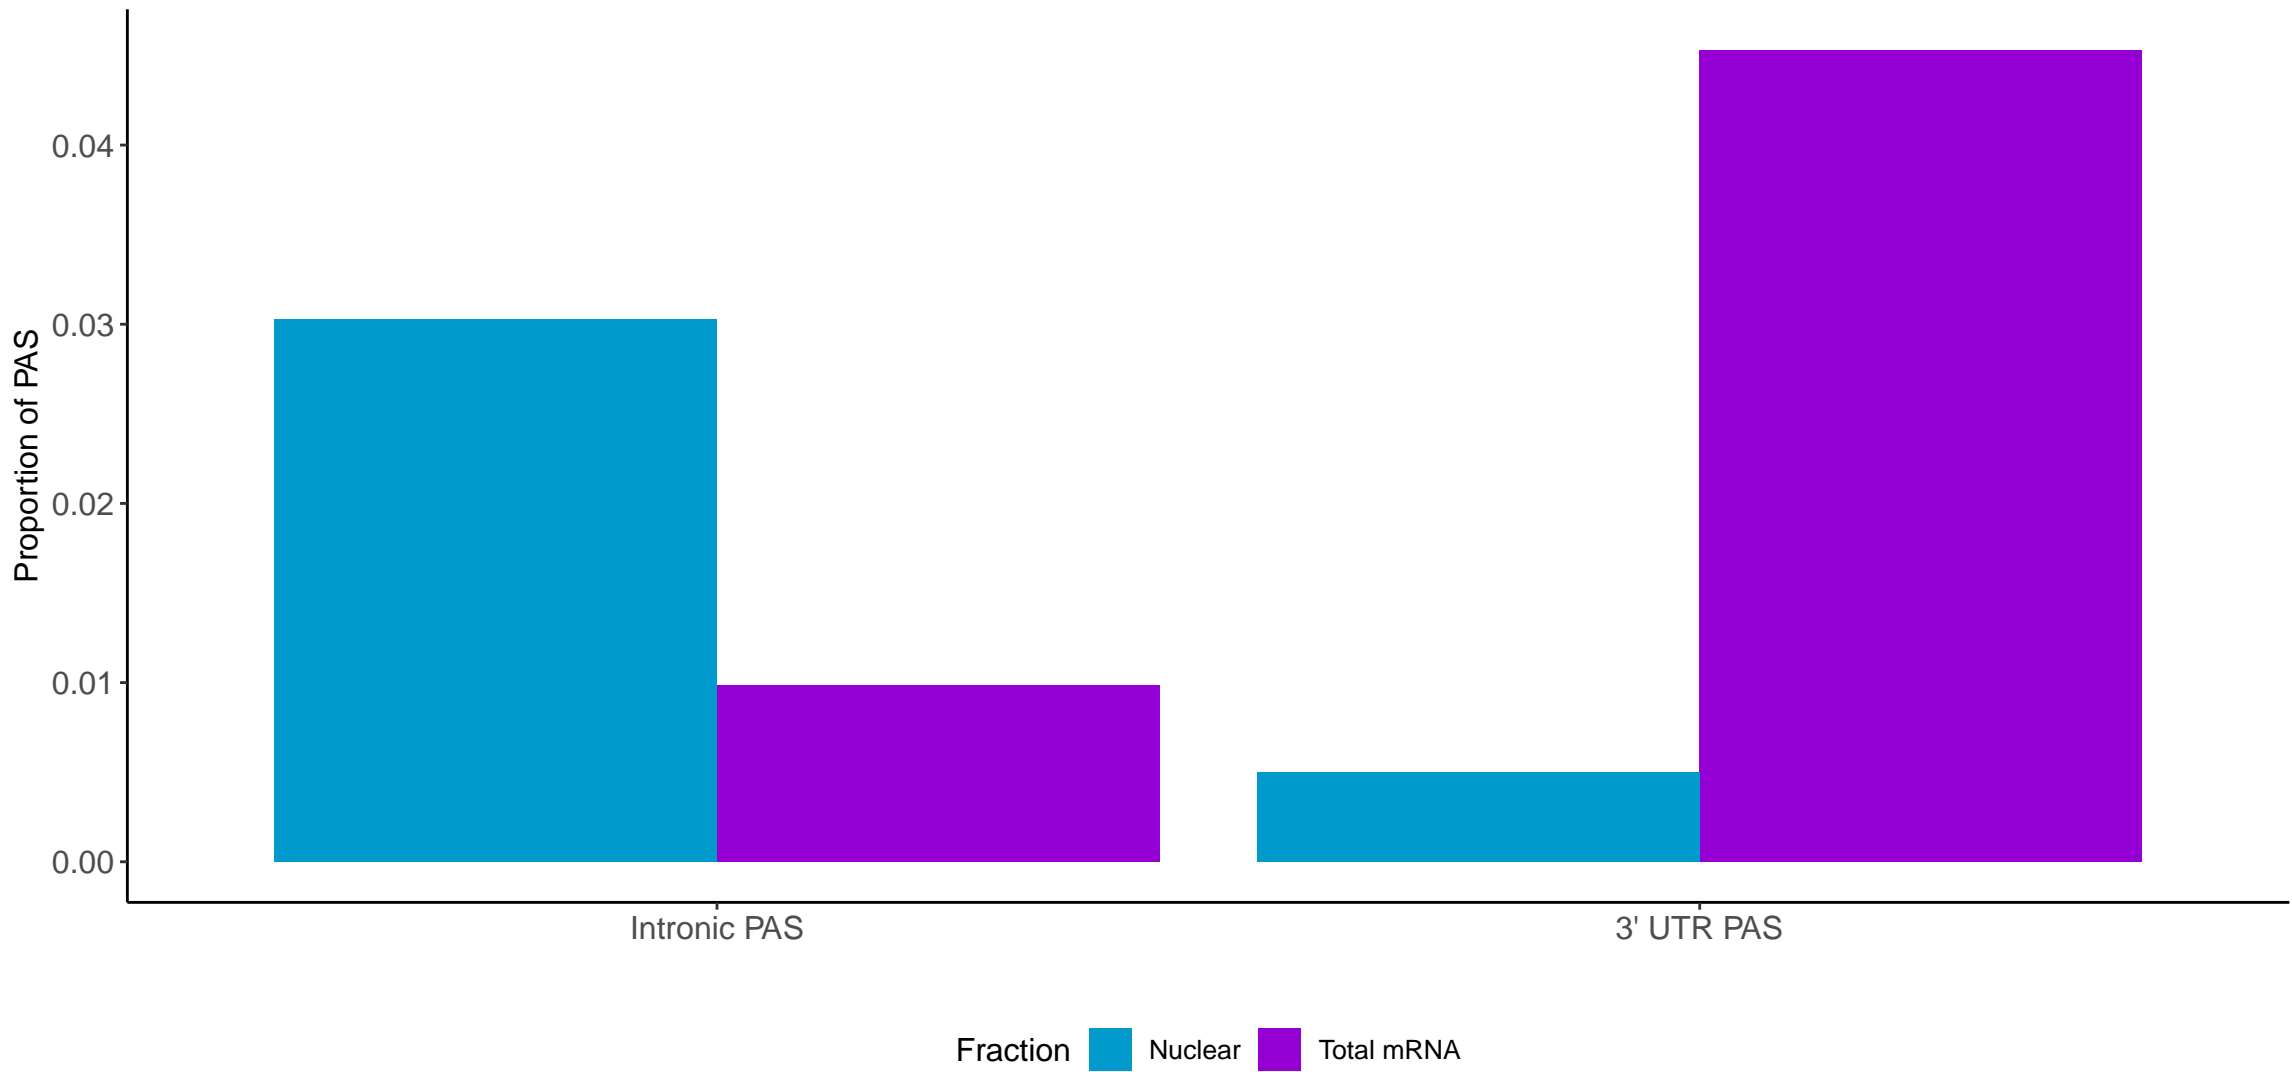

Supplement: supp [file elife-57492-supp-v1.zip › elife_poa_e57492_Figure_1_figure_supplement_5.pdf]

A

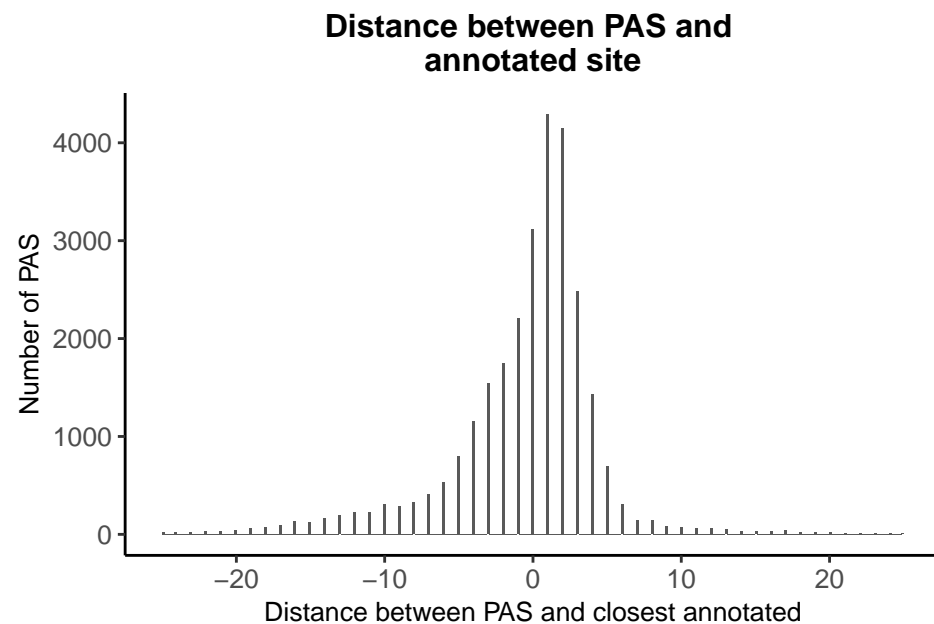

B

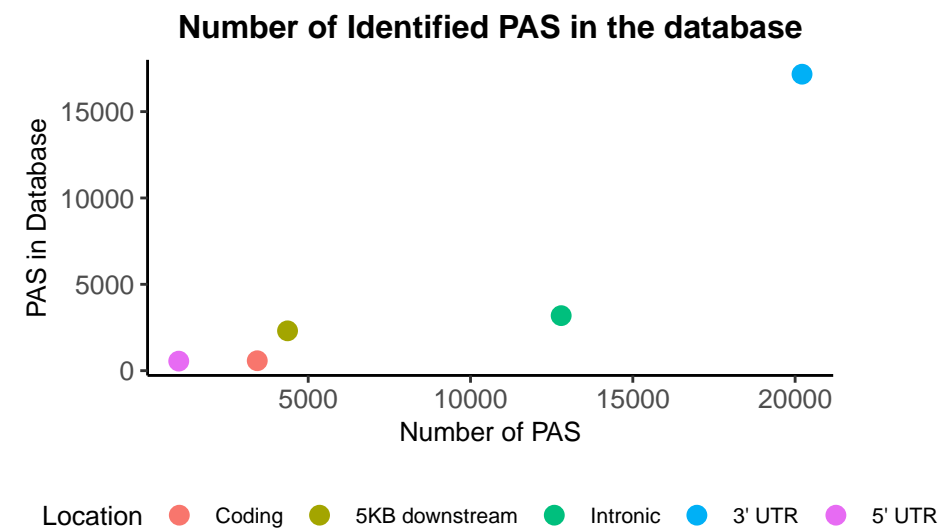

C

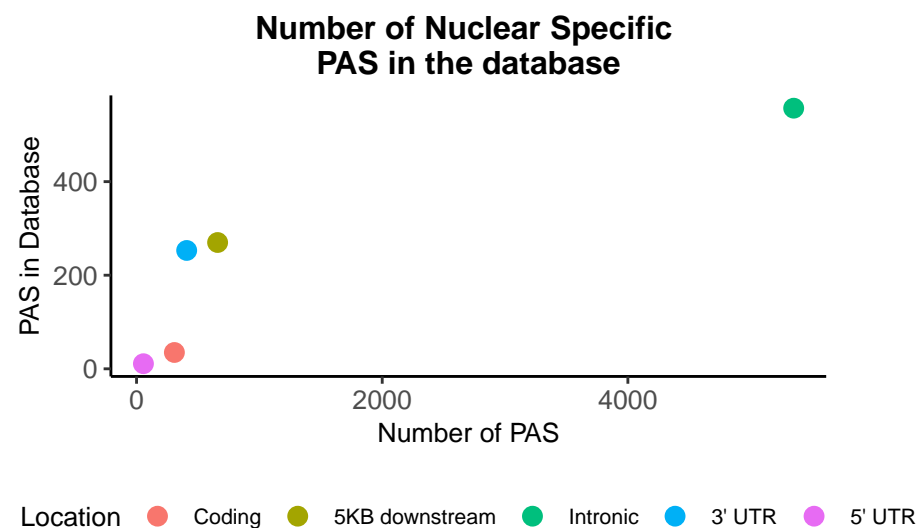

D

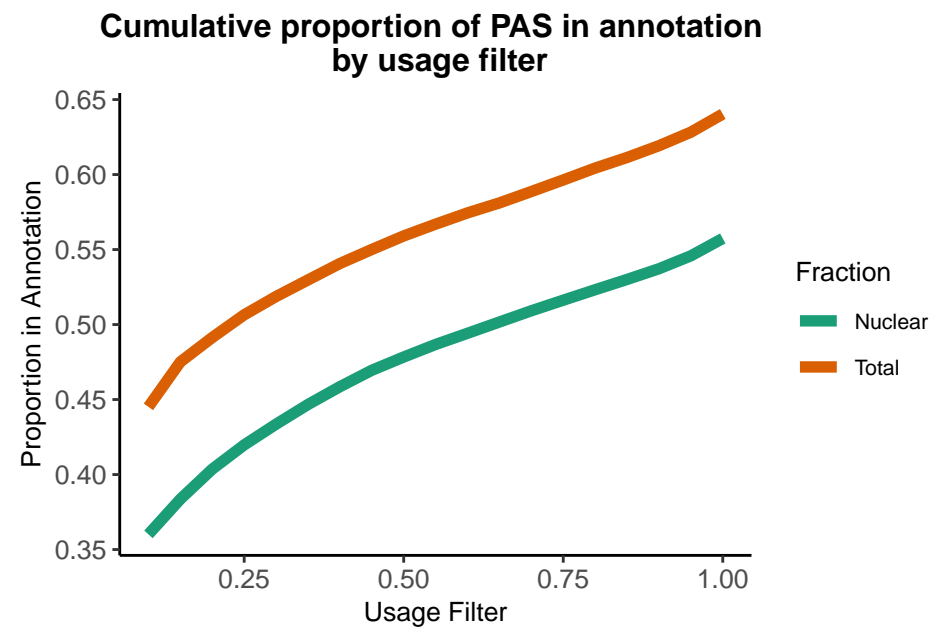

Supplement: supp [file elife-57492-supp-v1.zip › elife_poa_e57492_Figure_1_figure_supplement_6.pdf]

A

CTD: 7/6/17

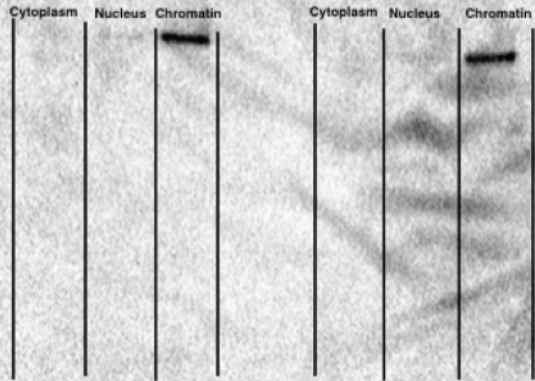

B

GAPDH: 7/6/17

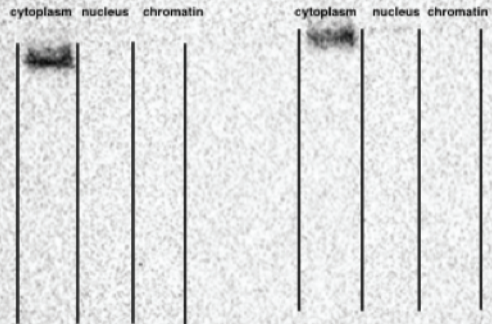

Supplement: supp [file elife-57492-supp-v1.zip › elife_poa_e57492_Figure_1_figure_supplement_7.pdf]

Proportion of reads mapped by Nuclear Library

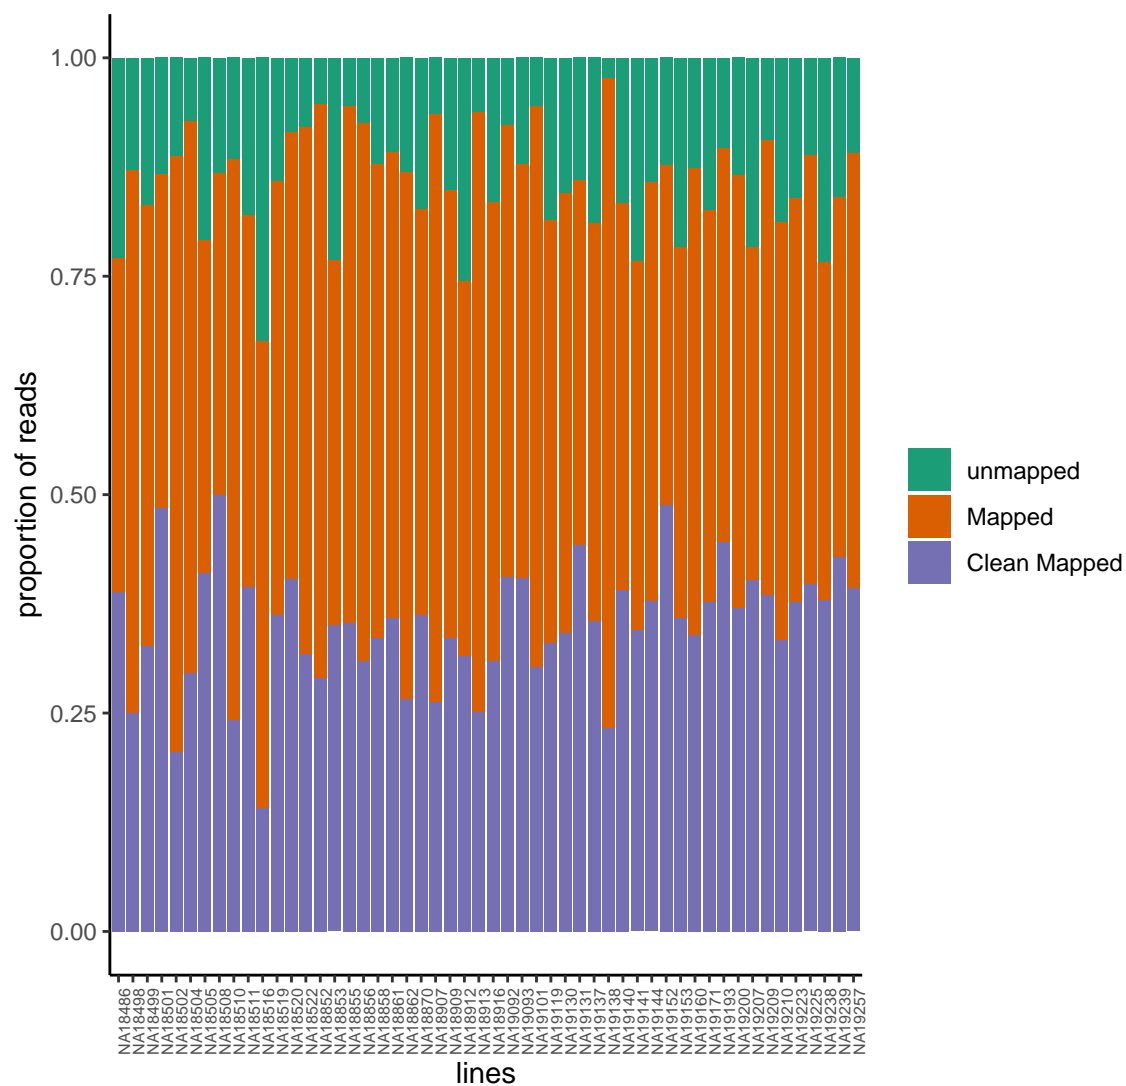

Supplement: supp [file elife-57492-supp-v1.zip › elife_poa_e57492_Figure_1_figure_supplement_8.pdf]

Proportion of reads mapped by Total mRNA library

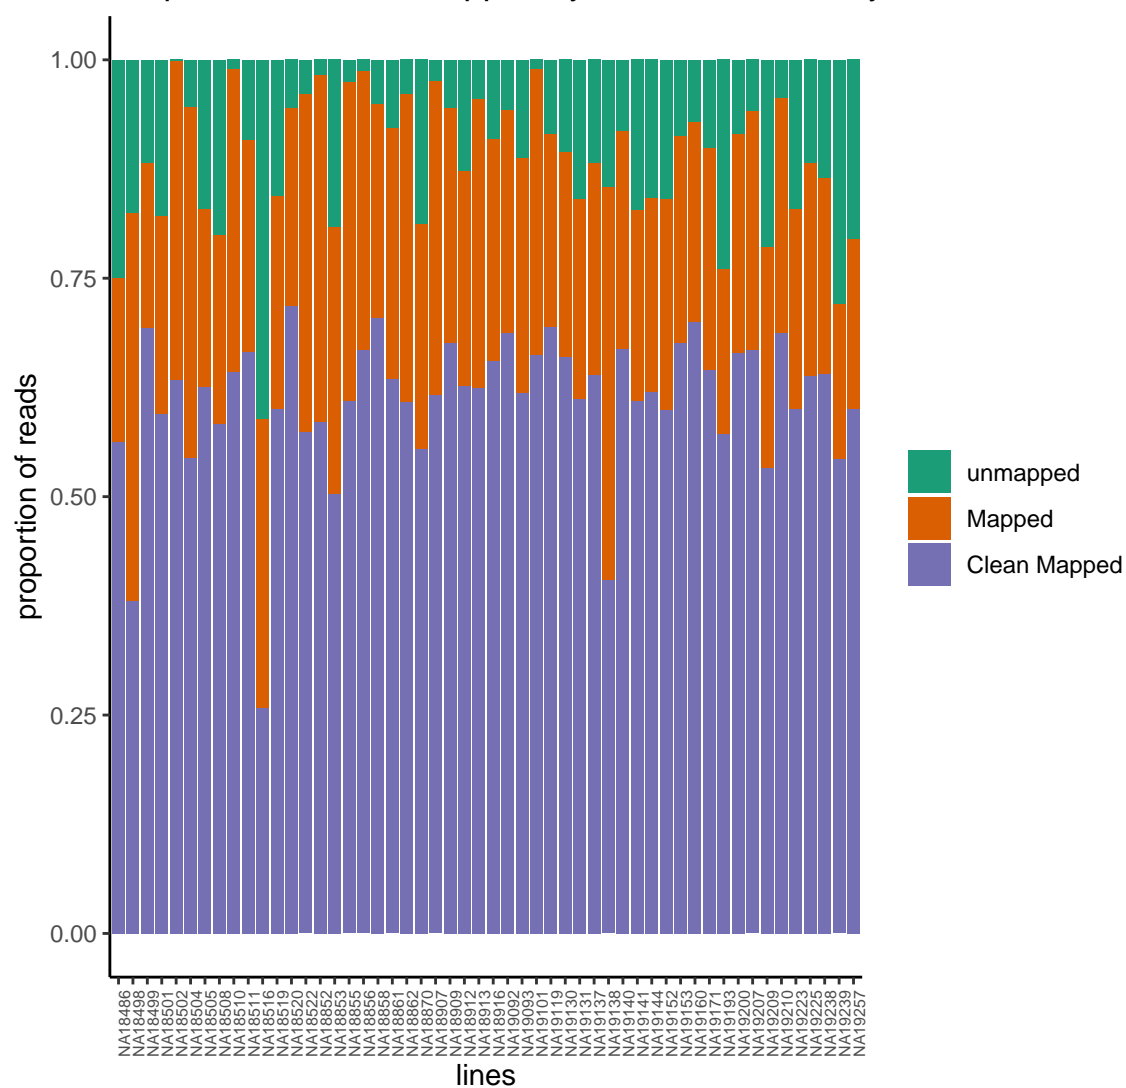

Supplement: supp [file elife-57492-supp-v1.zip › elife_poa_e57492_Figure_1_figure_supplement_9.pdf]

# Number of reads mapped in Nuclear libraries

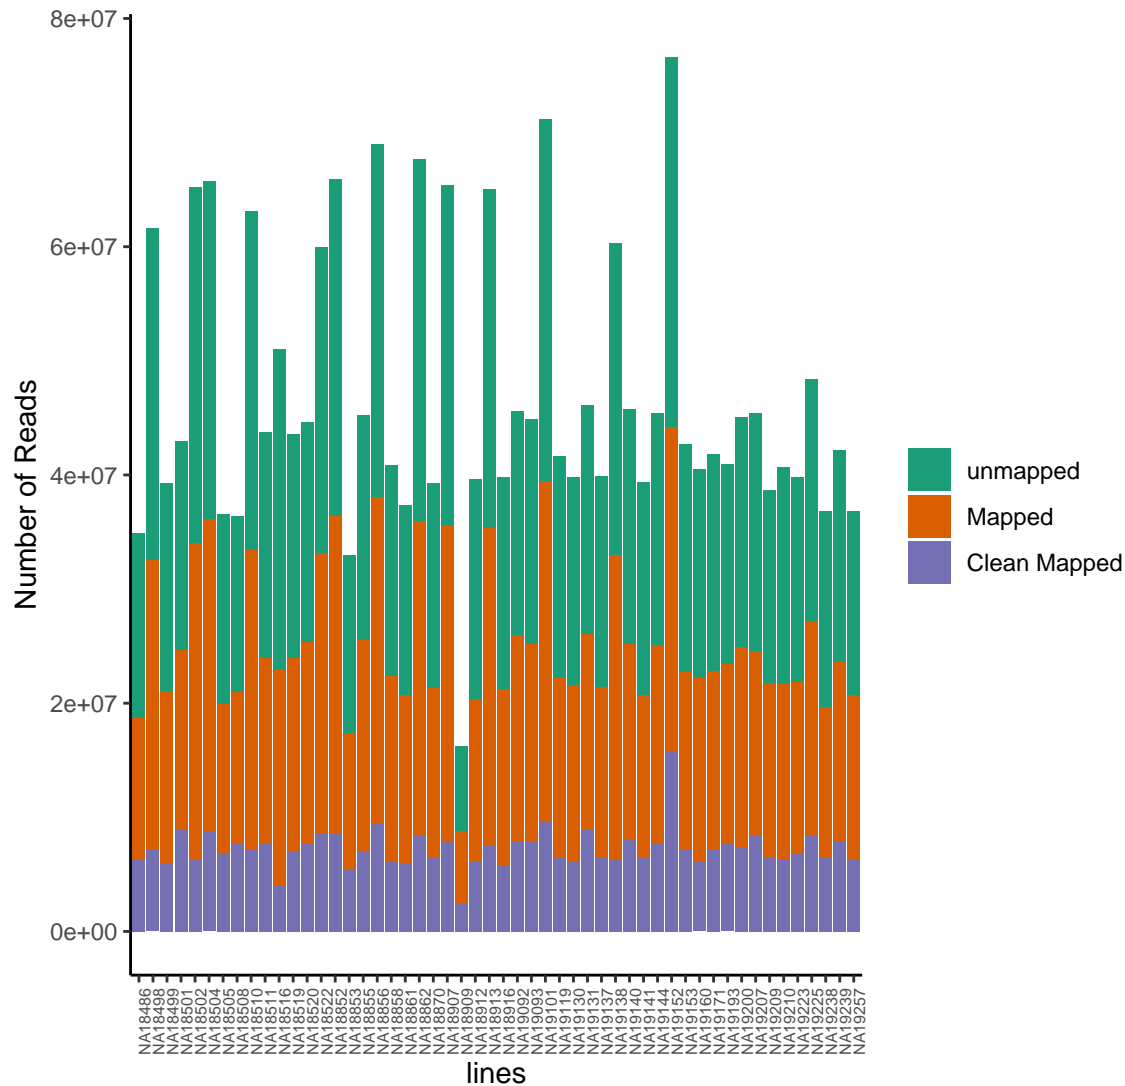

Supplement: supp [file elife-57492-supp-v1.zip › elife_poa_e57492_Figure_1_figure_supplement_10.pdf]

## Number of reads mapped in Total mRNA library

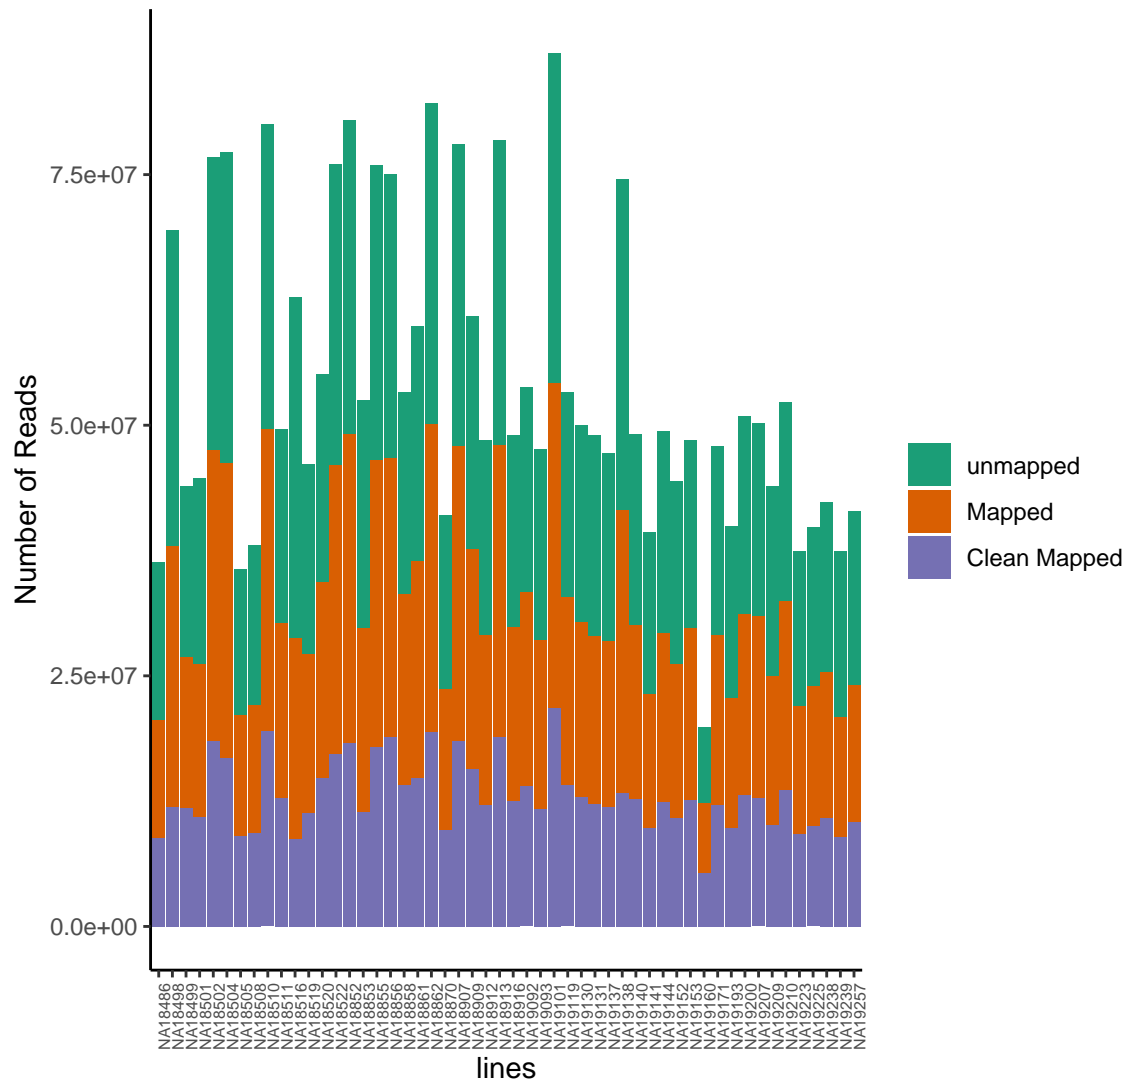

Supplement: supp [file elife-57492-supp-v1.zip › elife_poa_e57492_Figure_1_figure_supplement_11.pdf]

**A** Nuclear permuted pvalues for all snps  
4pc

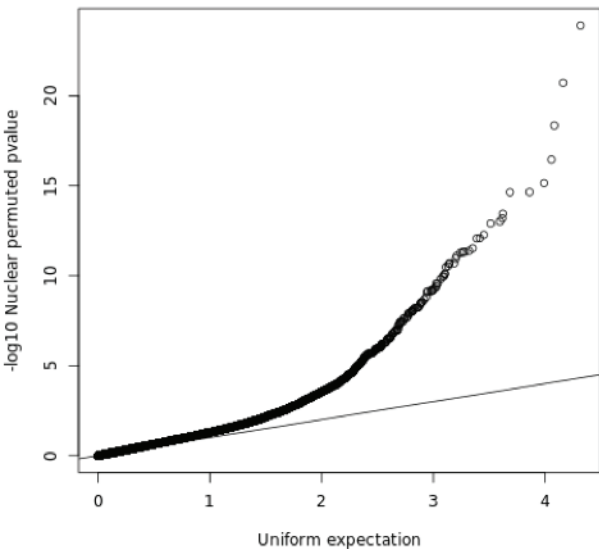

**B** Total permuted pvalues for all snps  
4pc

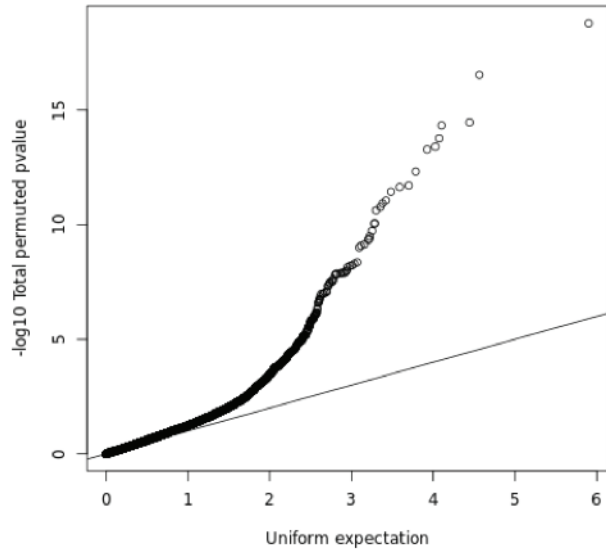

Supplement: supp [file elife-57492-supp-v1.zip › elife_poa_e57492_Figure_2_figure_supplement_1.pdf]

Frequency of apaQTLs among PAS

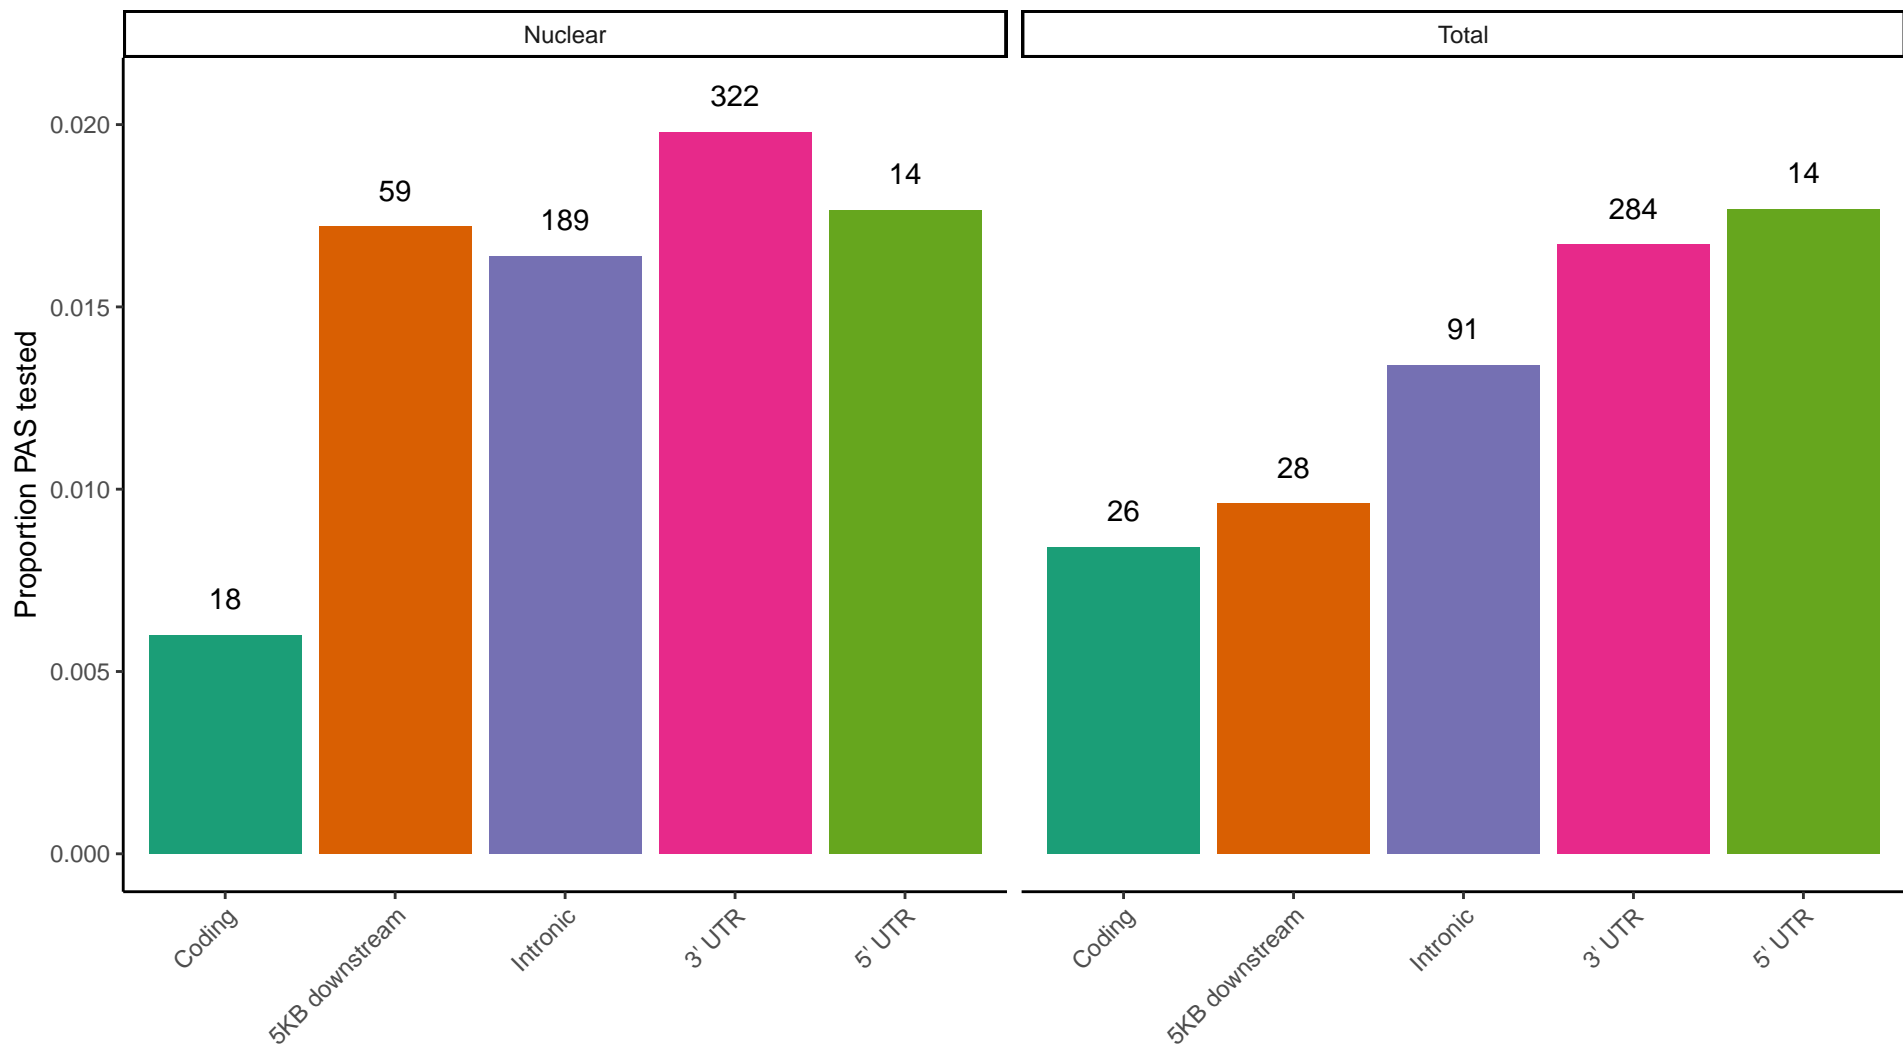

Supplement: supp [file elife-57492-supp-v1.zip › elife_poa_e57492_Figure_2_figure_supplement_2.pdf]

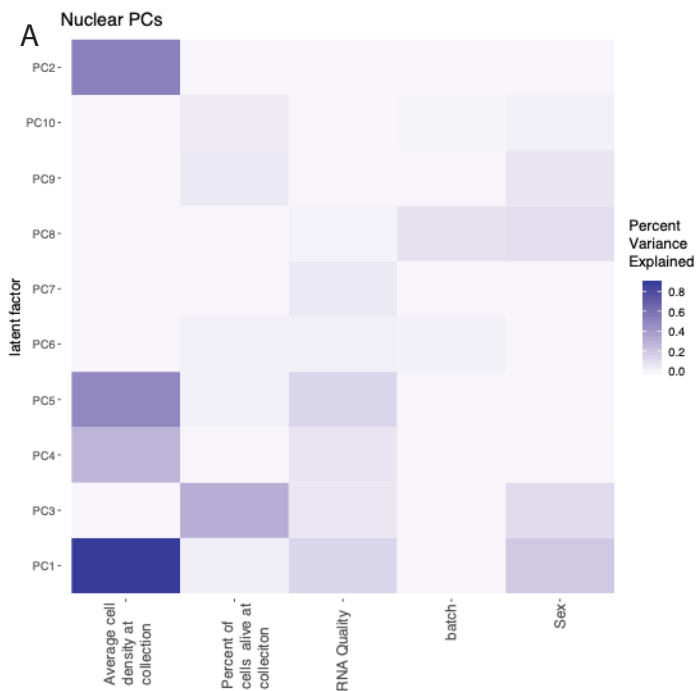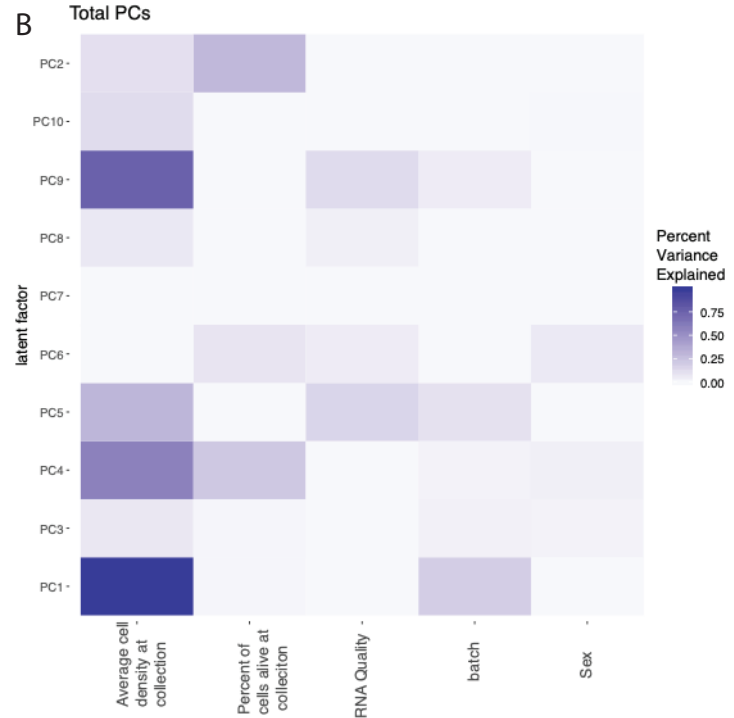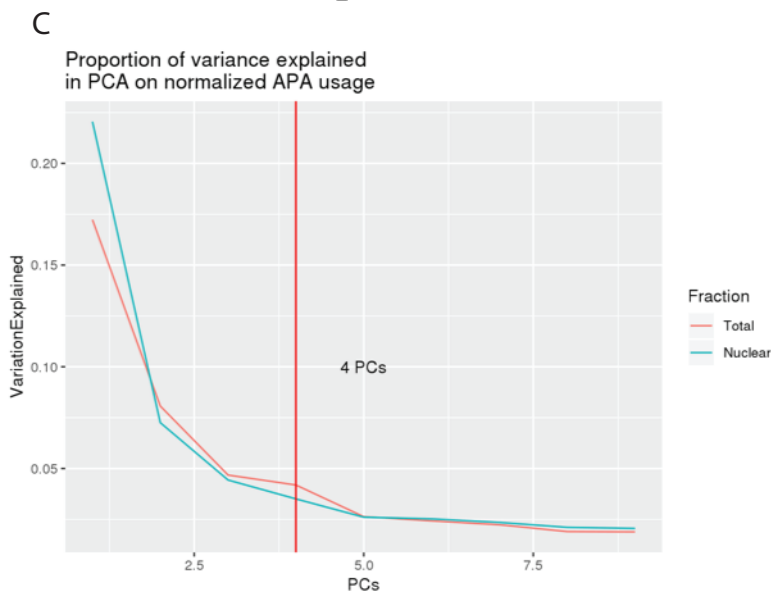

Supplement: supp [file elife-57492-supp-v1.zip › elife_poa_e57492_Figure_2_figure_supplement_3.pdf]

### Distance from QTL SNP to PAS by Fraction

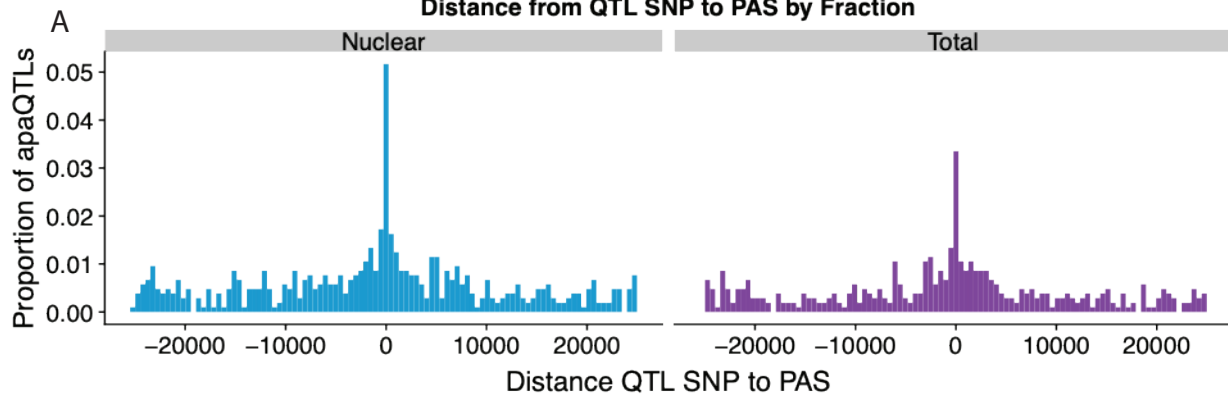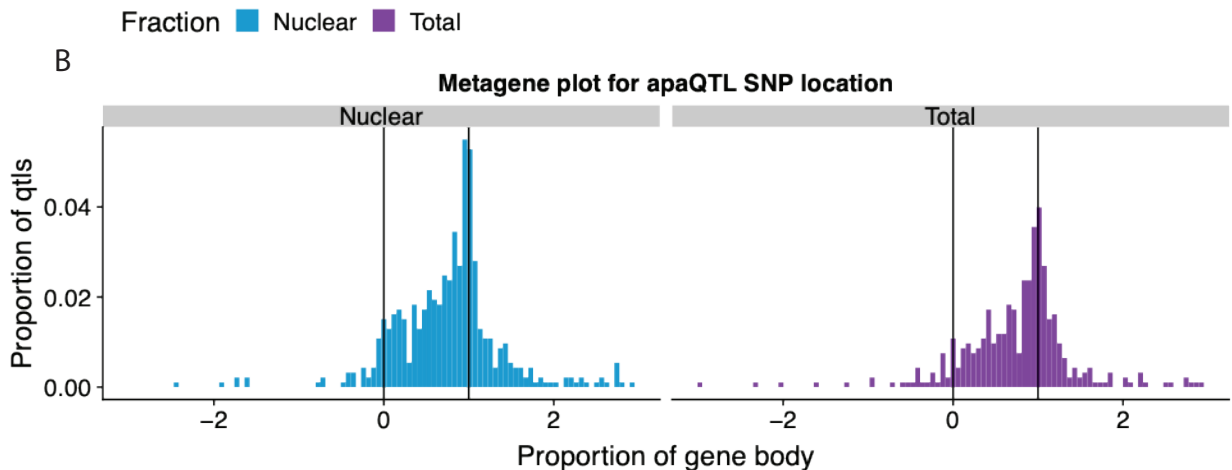

Supplement: supp [file elife-57492-supp-v1.zip › elife_poa_e57492_Figure_2_figure_supplement_4.pdf]

A

Nuclear Apa

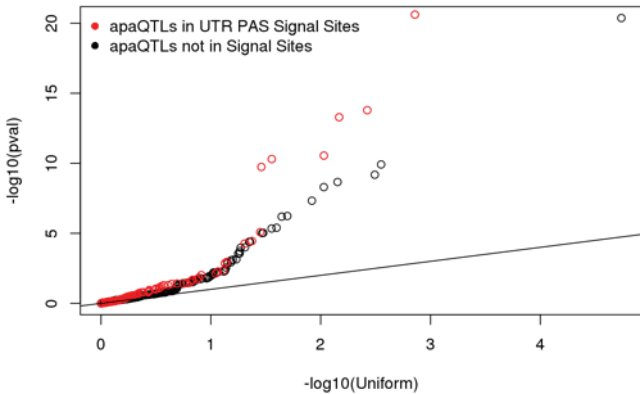

B

Total Apa

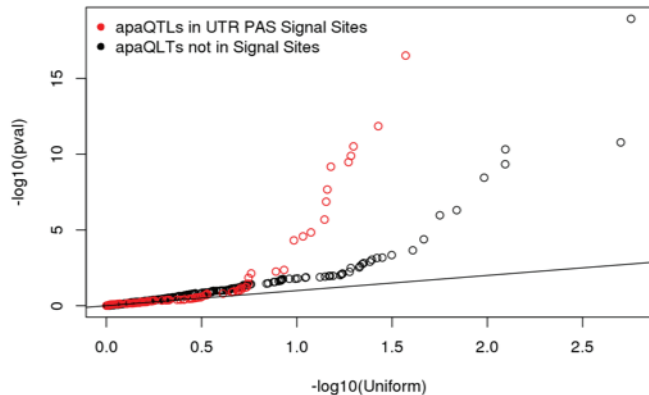

Supplement: supp [file elife-57492-supp-v1.zip › elife_poa_e57492_Figure_2_figure_supplement_5.pdf]

**A**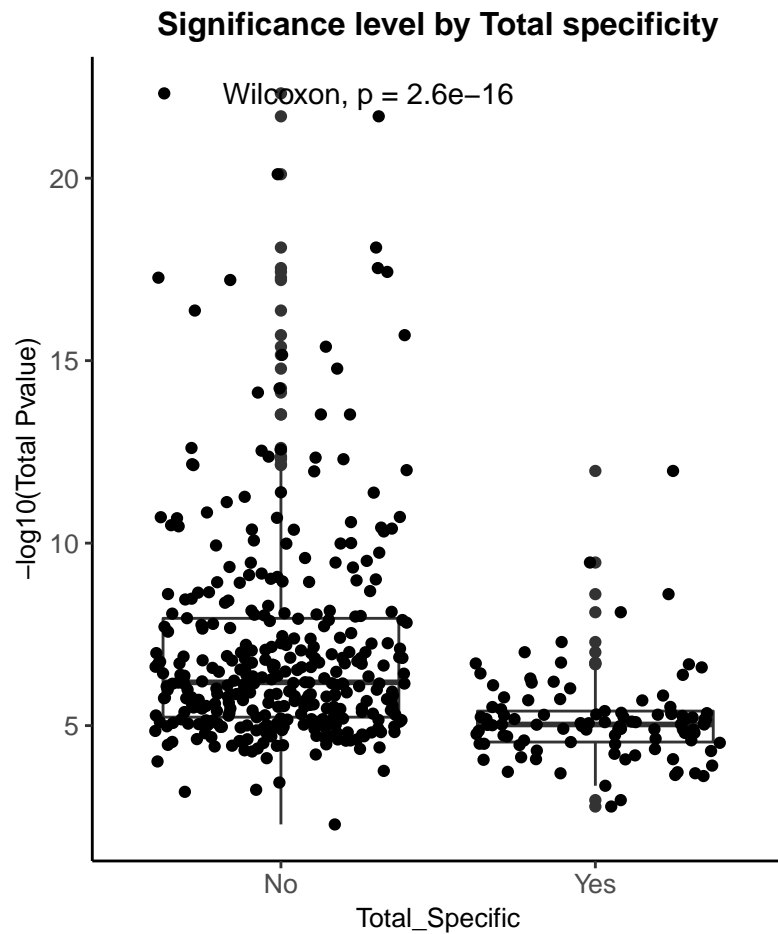**B**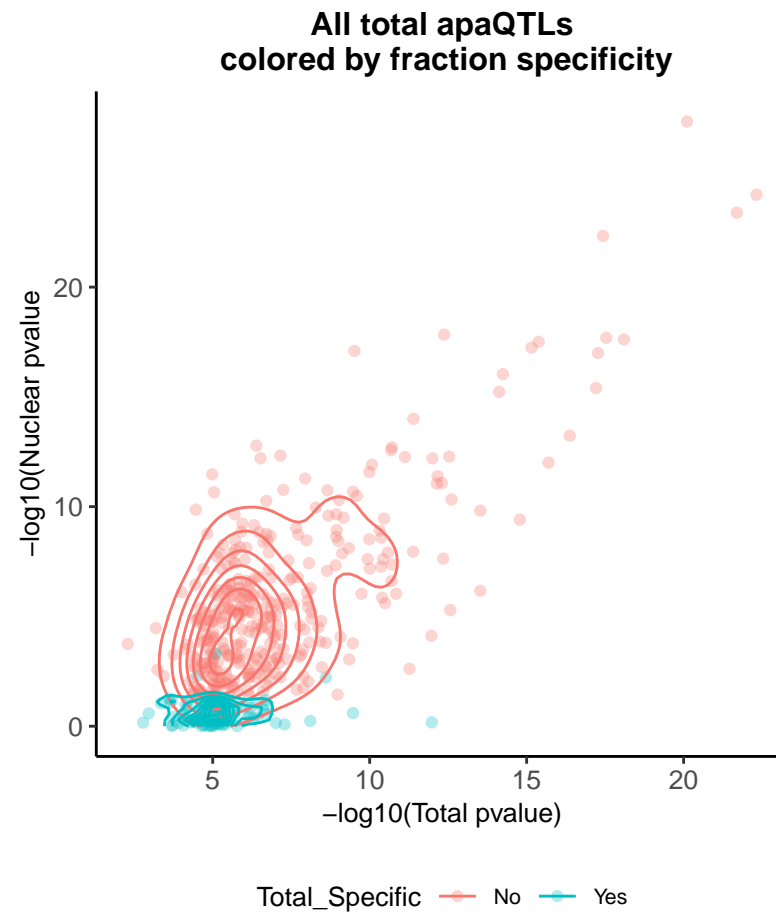

Supplement: supp [file elife-57492-supp-v1.zip › elife_poa_e57492_Figure_2_figure_supplement_6.pdf]

A

### Significant Total APA QTLs Nuclear

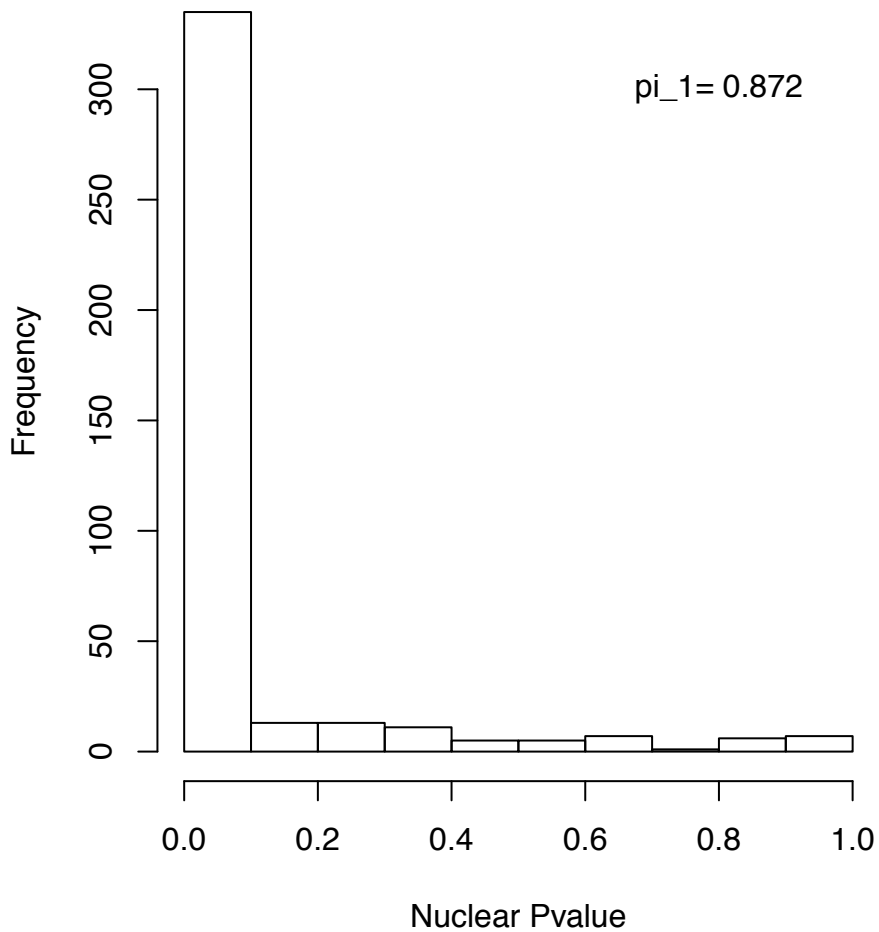

B

### Significant Nuclear APA QTLs Total

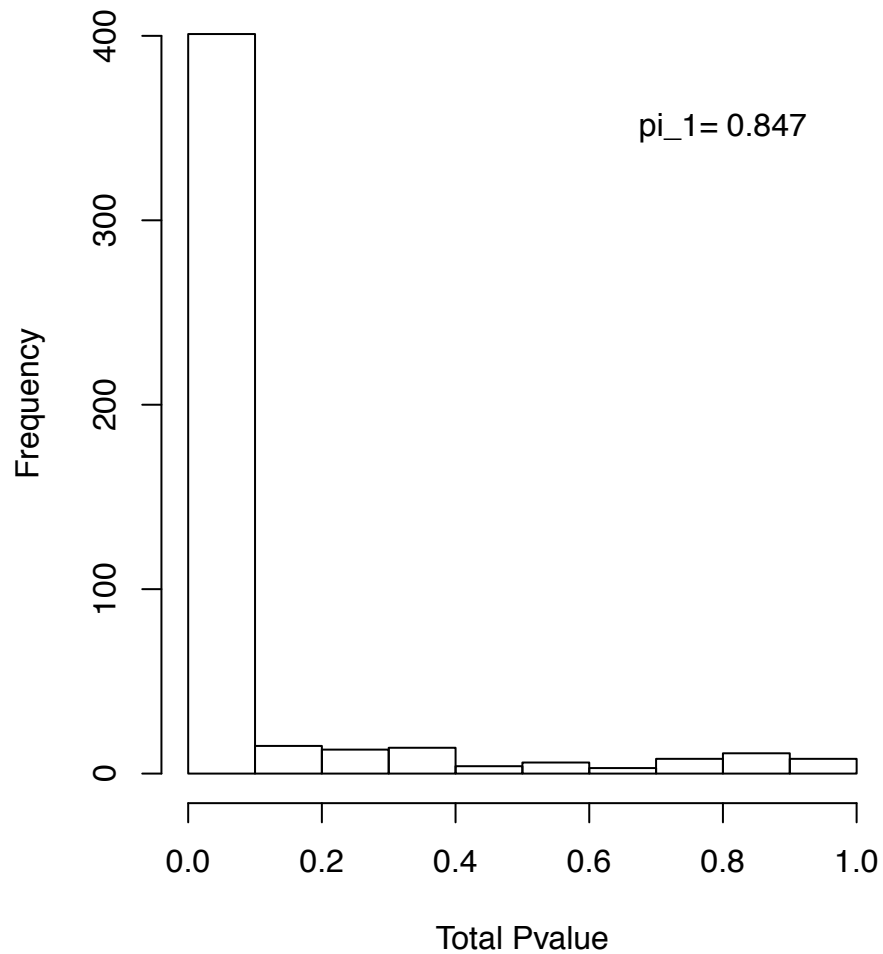

Supplement: supp [file elife-57492-supp-v1.zip › elife_poa_e57492_Figure_2_figure_supplement_7.pdf]

**A**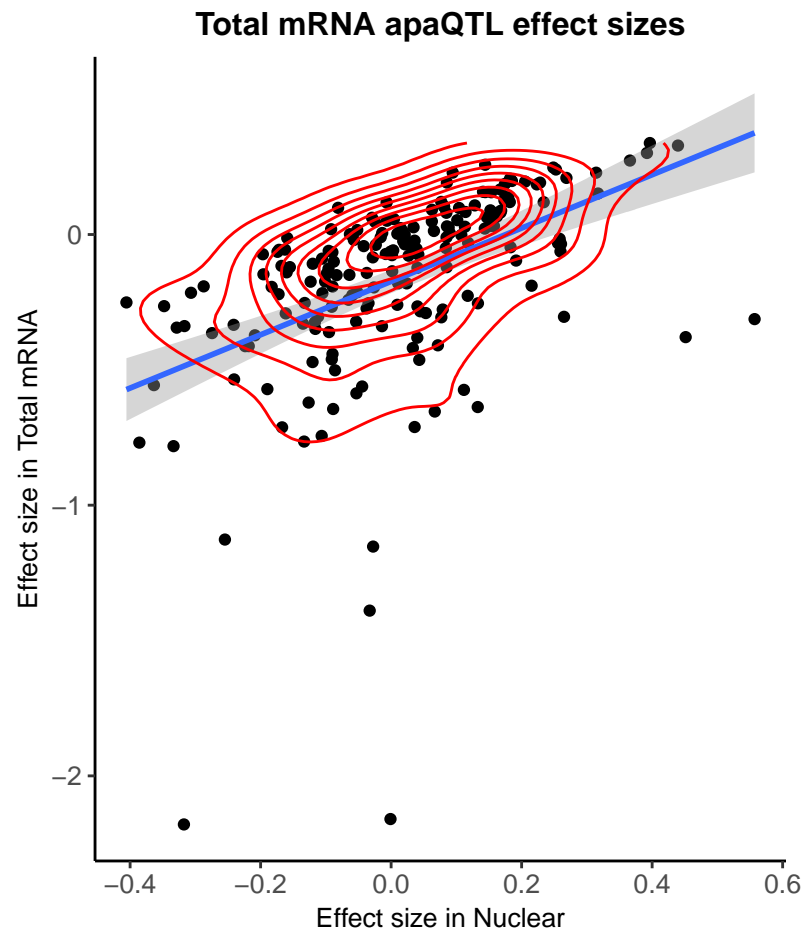**B**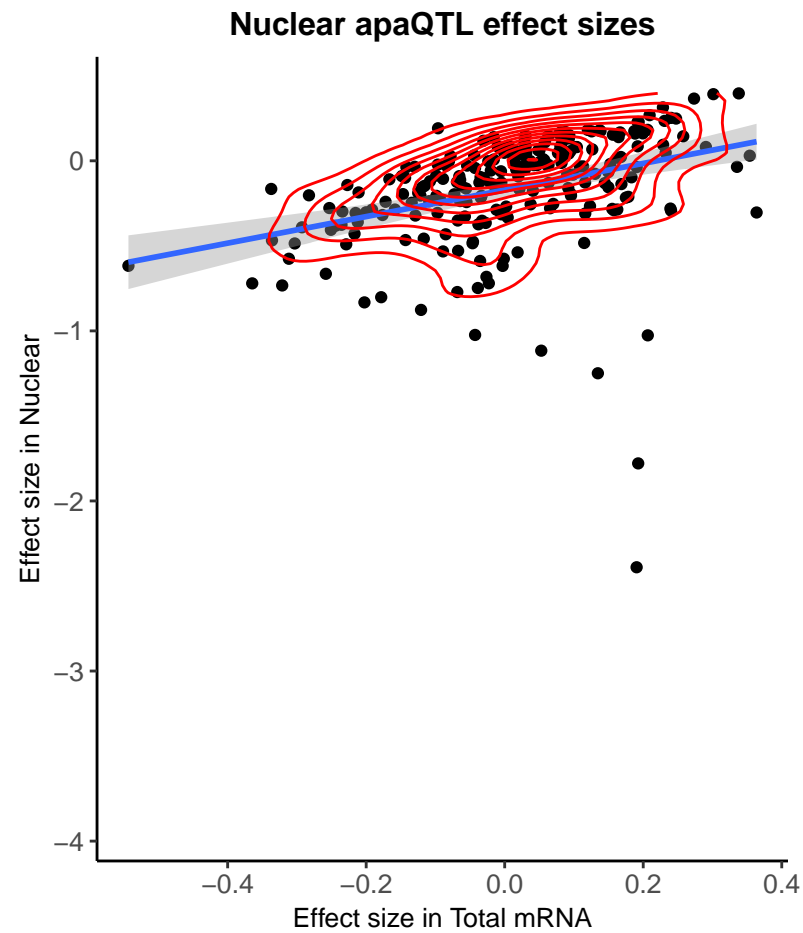

Supplement: supp [file elife-57492-supp-v1.zip › elife_poa_e57492_Figure_2_figure_supplement_8.pdf]

Figure 3a without outlier

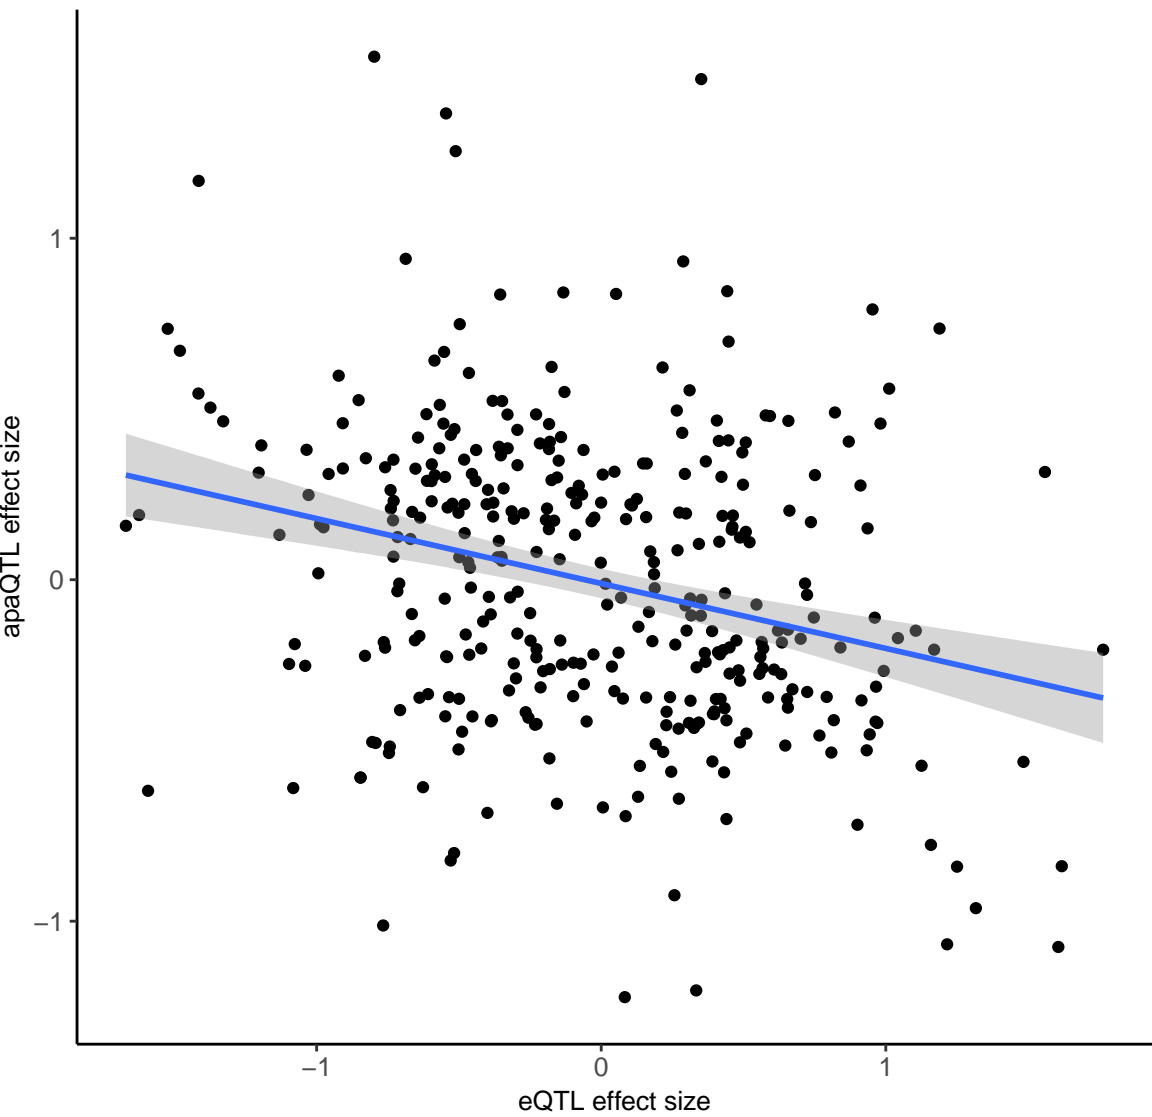

Supplement: supp [file elife-57492-supp-v1.zip › elife_poa_e57492_Figure_3_figure_supplement_1.pdf]

# Total Apa

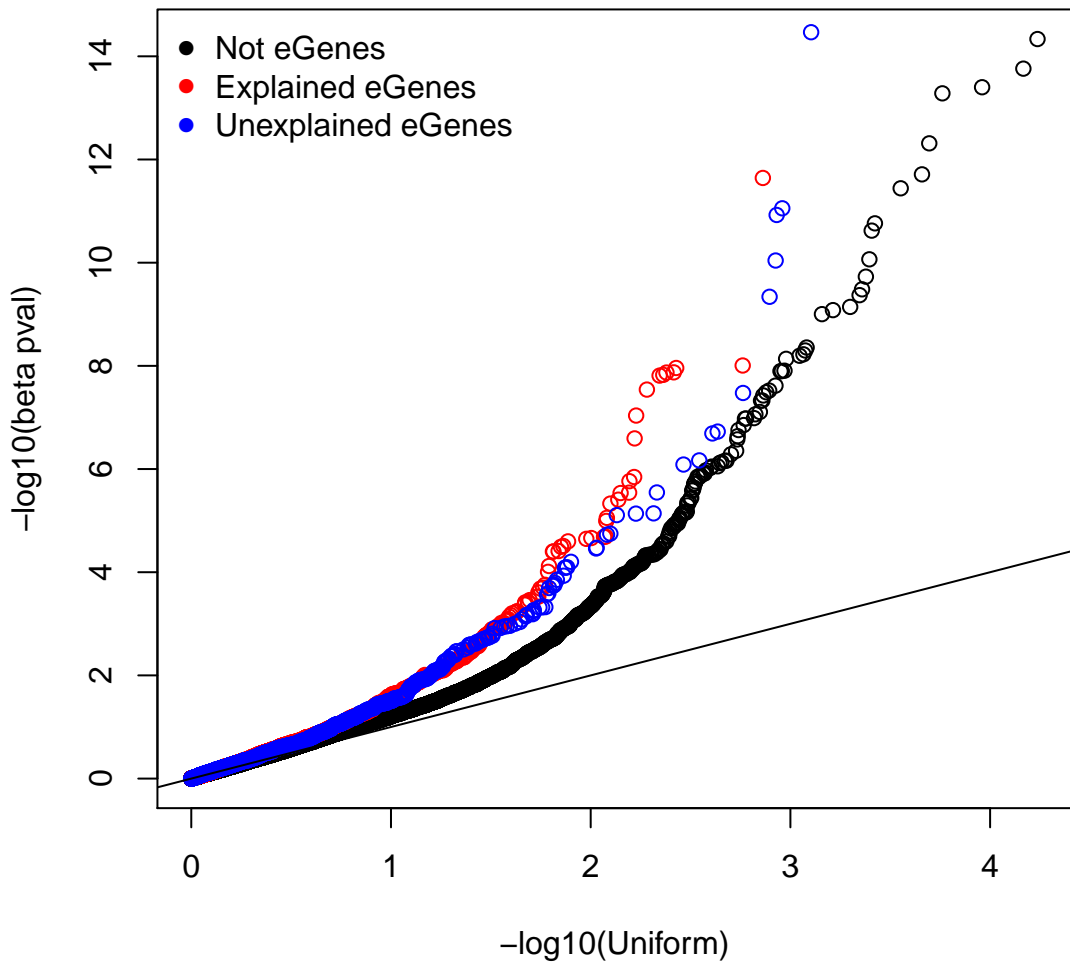

Supplement: supp [file elife-57492-supp-v1.zip › elife_poa_e57492_Figure_3_figure_supplement_2.pdf]

Proportion of eQTLs explained by apaQTLs

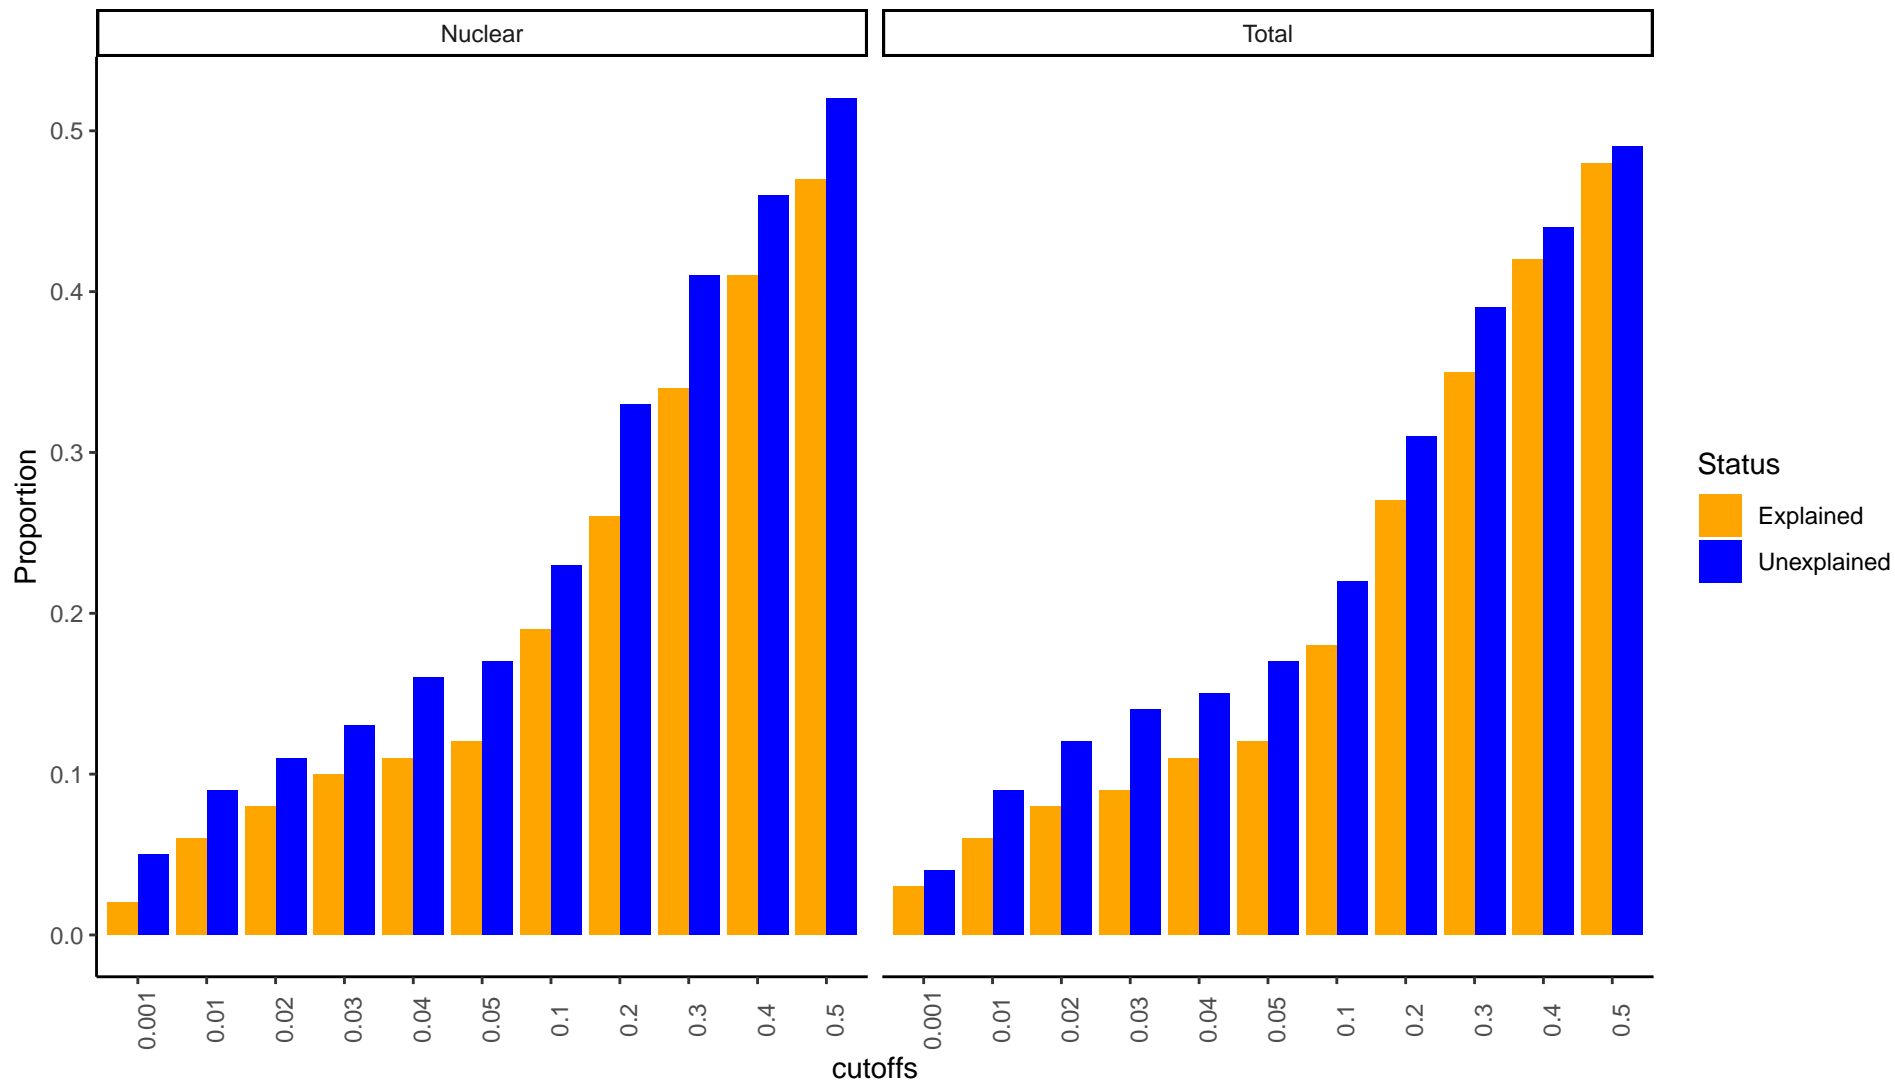

Supplement: supp [file elife-57492-supp-v1.zip › elife_poa_e57492_Figure_3_figure_supplement_4.pdf]

A

Total Apa

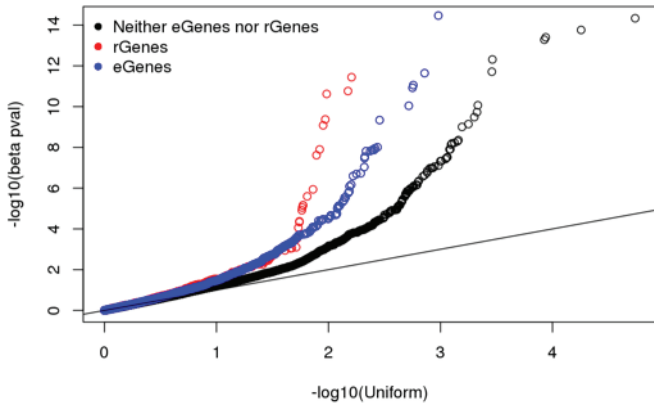

B

Total Apa

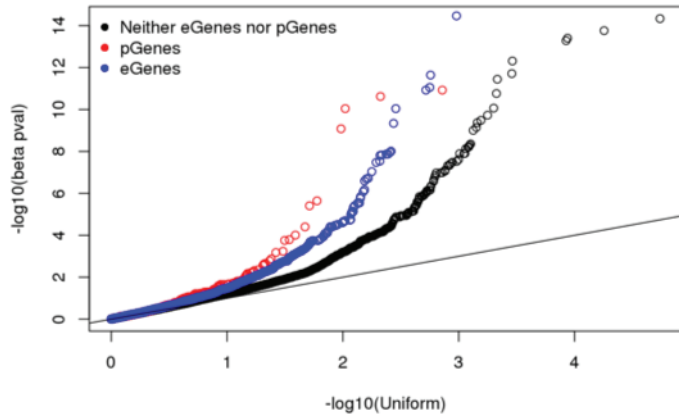

Supplement: supp [file elife-57492-supp-v1.zip › elife_poa_e57492_Figure_4_figure_supplement_1.pdf]

EIF2A Nuclear APA

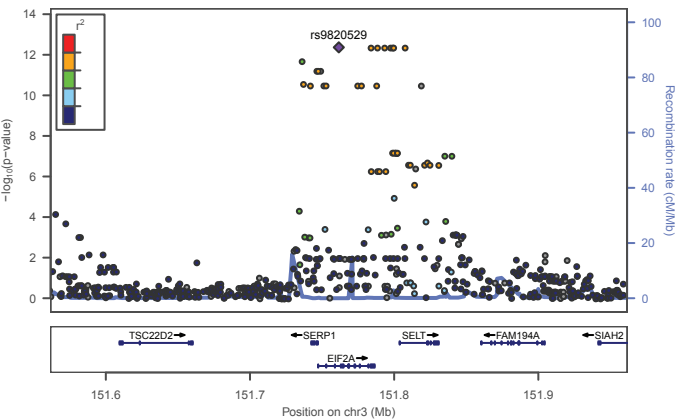

EIF2A RNA

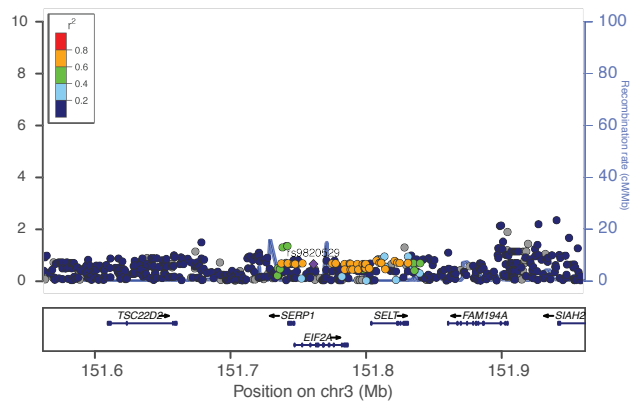

EIF2A RiboSeq

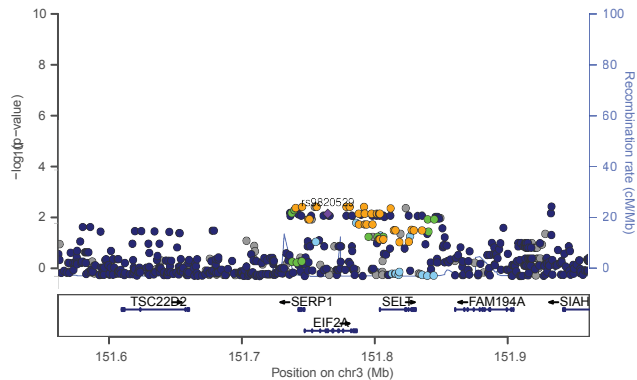

EIF2A Protein

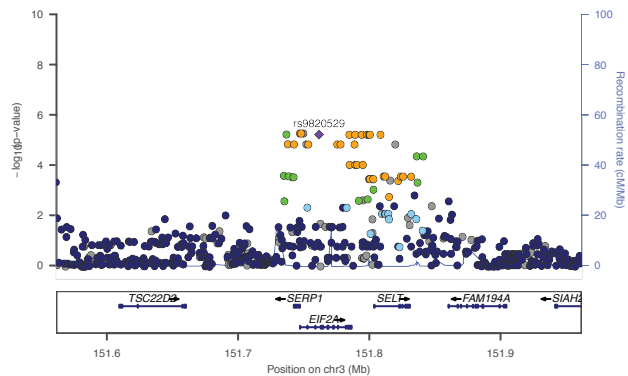

Supplement: supp [file elife-57492-supp-v1.zip › elife_poa_e57492_Figure_4_figure_supplement_2.pdf]

# ChromHMM locations for all QTLs

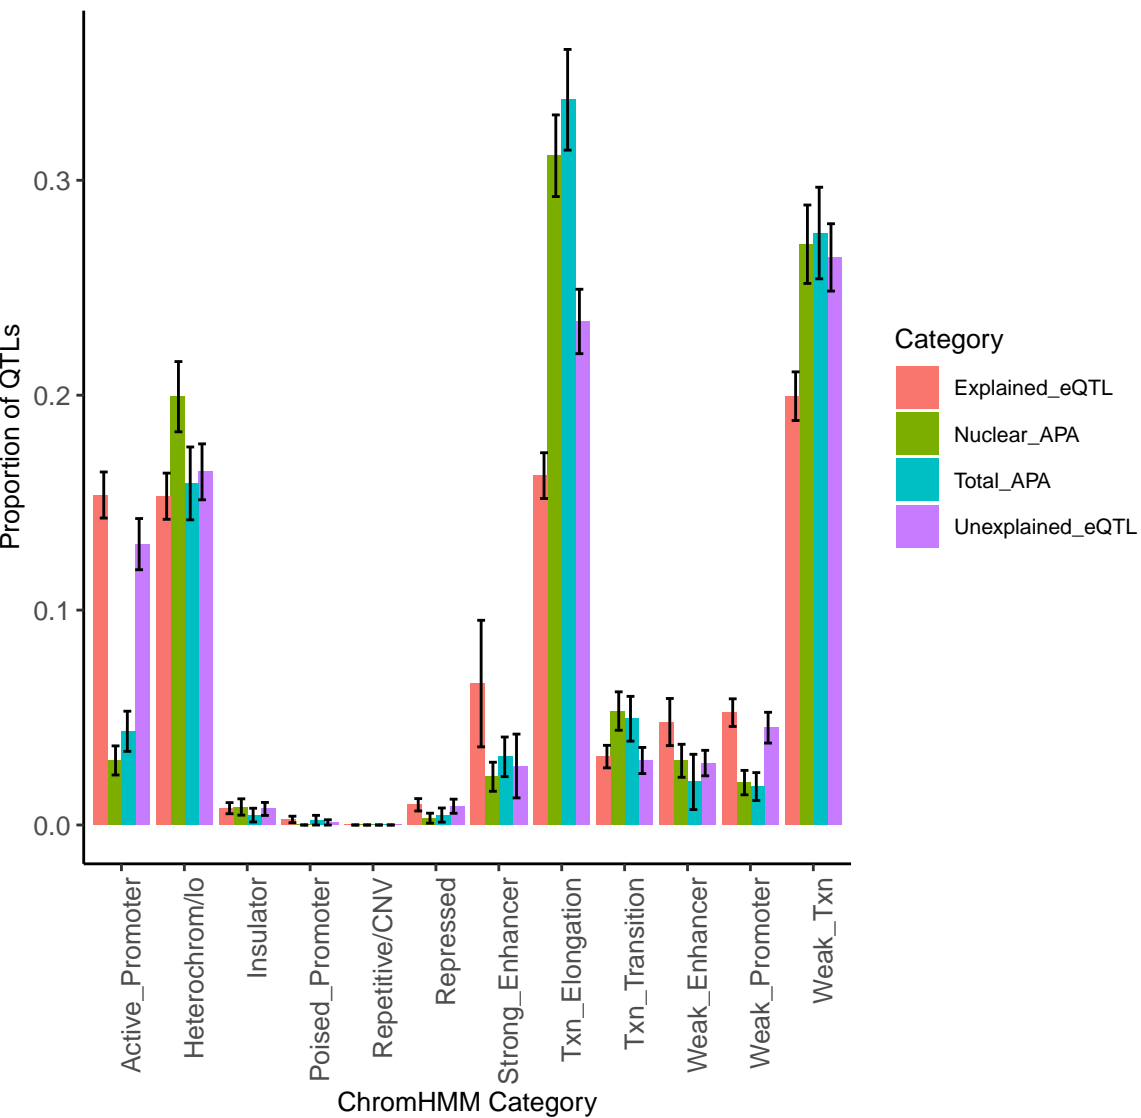

Supplement: supp [file elife_poa_e57492_Figure_3_figure_supplement_3.pdf › elife_poa_e57492_Figure_3_figure_supplement_3.pdf]

**A**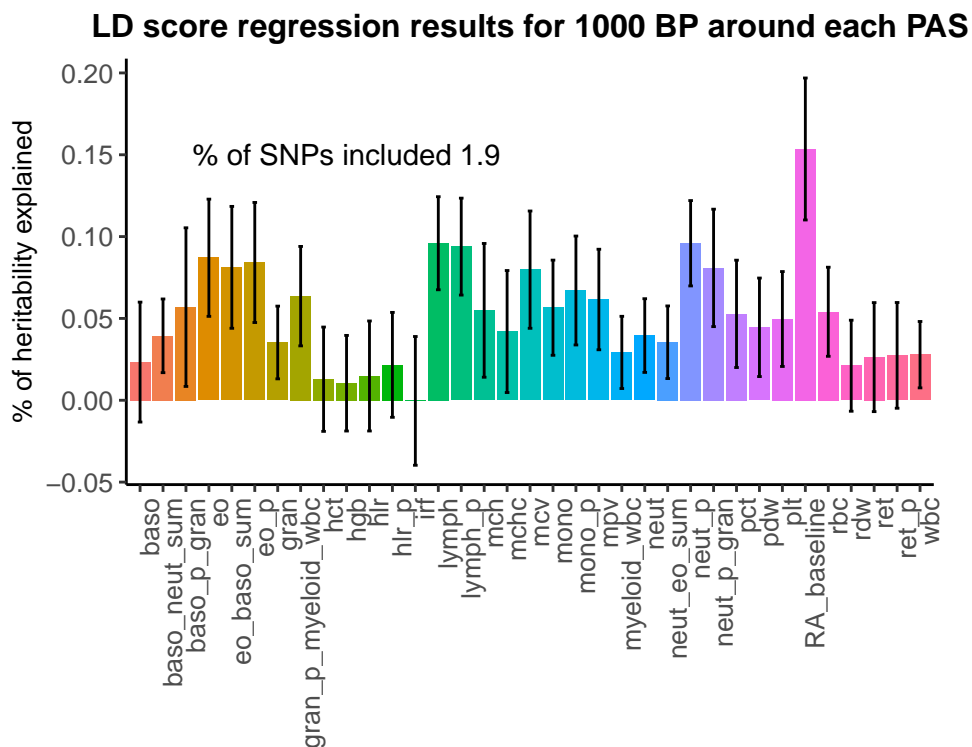**B**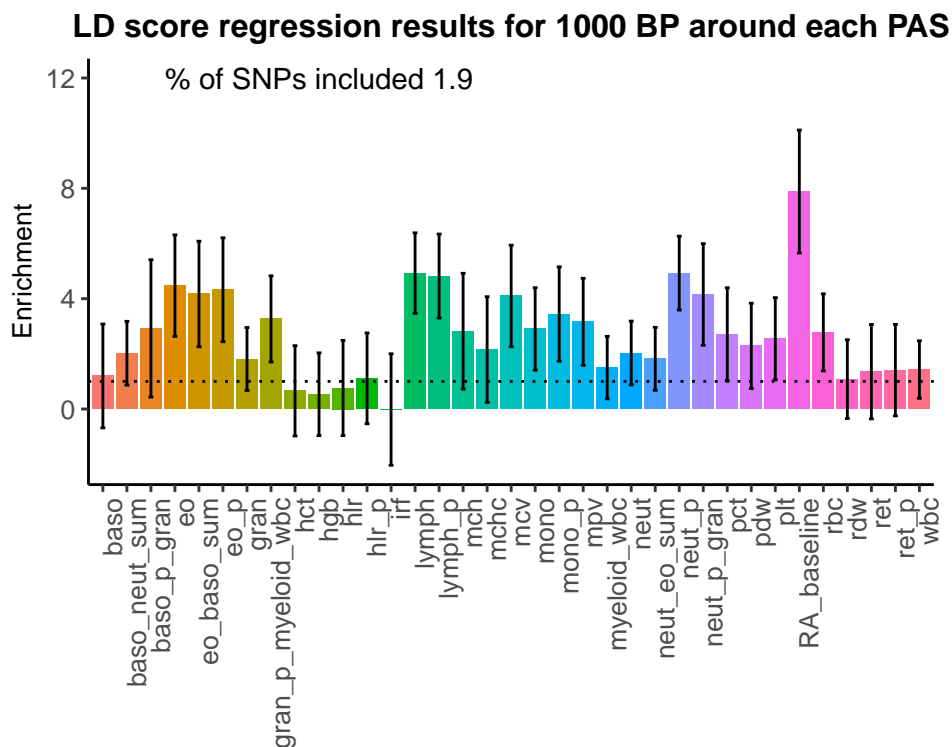

Supplement: supp [file elife_poa_e57492_Figure_4_figure_supplement_3.pdf › elife_poa_e57492_Figure_4_figure_supplement_3.pdf]
